# Supplementary material for: Exploring the Nursing Factors Related to Ventilator-Associated Pneumonia in the Intensive Care Unit
Source: Front Public Health. 2022 Apr 6;10:715566. doi: 10.3389/fpubh.2022.715566 (PMC9019058; doi:10.3389/fpubh.2022.715566)
Supplement: Supplementary file 2 [file Table_2.xls]

## Sheet: Sheet1
Hospital name				Highest degree in nursing					Information of specialist nurses		years of ICU service
	Number of ICU open beds	The total number of nurses	nurse-to-bed ratio	Junior college and below	Ratio of Junior college degree	the number of Bachelor degree	Ratio of Bachelor degree	the number of master's degree	total number	Ratio of Specialist nurses	≤5y	≤5y Ratio of nurse	5-10y	5＜a≤10y Ratio of nurse	＞10y	＞10y Ratio of nurse	12、Nurse Shift Arrangement	12、Nurse Shift Arrangement	13、The frequency of nurses working night shift is ____ once a day	Nurse in charge of patient count (daytime)	Nurse responsible for patient count (night)	Frequency of oral care (times/day)	Oral care fluid routine selection	Oral care fluid routine selection	Oral care tools	Oral care tools_	16、Oral care methods	17、Choice of endotracheal tube/tracheotomy tube	17、Choice of endotracheal tube/tracheotomy tube	Air bag pressure monitoring frequency(times/day)	Air bag pressure monitoring method	Models of common sputum suction tubes	Is auscultation performed before sputum suction	Is auscultation performed before sputum suction	Is atomization inhaled in patients with instrument ventilation	Is atomization inhaled in patients with instrument ventilation	3、Is gastric residue routinely monitored	3、Is gastric residue routinely monitored	VAP prevalence rate‰
Affiliated Hospital of North China University of Science and Technology	32	63	1.96	7	11.1111	55	87.3016	1	3	4.7619	15	23.8095	20	31.746	28	44.4444	1	12h regulations	4	2	2	4	1	has antiseptic action	1	Oral care package	1	2	no	2	1	12	1	hear	1	atomization	1	Yes	0
	32	63	1.96	7	11.1111	55	87.3016	1	3	4.7619	15	23.8095	20	31.746	28	44.4444	1	12h regulations	4	2	2	4	1	has antiseptic action	1	Oral care package	1	2	no	2	1	12	1	hear	1	atomization	1	Yes	0
	32	63	1.96	7	11.1111	55	87.3016	1	3	4.7619	15	23.8095	20	31.746	28	44.4444	1	12h regulations	4	2	2	4	1	has antiseptic action	1	Oral care package	1	2	no	2	1	12	1	hear	1	atomization	1	Yes	0
	32	63	1.96	7	11.1111	55	87.3016	1	3	4.7619	15	23.8095	20	31.746	28	44.4444	1	12h regulations	4	2	2	4	1	has antiseptic action	1	Oral care package	1	2	no	2	1	12	1	hear	1	atomization	1	Yes	0
	32	63	1.96	7	11.1111	55	87.3016	1	3	4.7619	15	23.8095	20	31.746	28	44.4444	1	12h regulations	4	2	2	4	1	has antiseptic action	1	Oral care package	1	2	no	2	1	12	1	hear	1	atomization	1	Yes	0
	32	63	1.96	7	11.1111	55	87.3016	1	3	4.7619	15	23.8095	20	31.746	28	44.4444	1	12h regulations	4	2	2	4	1	has antiseptic action	1	Oral care package	1	2	no	2	1	12	1	hear	1	atomization	1	Yes	0
	32	63	1.96	7	11.1111	55	87.3016	1	3	4.7619	15	23.8095	20	31.746	28	44.4444	1	12h regulations	4	2	2	4	1	has antiseptic action	1	Oral care package	1	2	no	2	1	12	1	hear	1	atomization	1	Yes	0
	32	63	1.96	7	11.1111	55	87.3016	1	3	4.7619	15	23.8095	20	31.746	28	44.4444	1	12h regulations	4	2	2	4	1	has antiseptic action	1	Oral care package	1	2	no	2	1	12	1	hear	1	atomization	1	Yes	0
	32	63	1.96	7	11.1111	55	87.3016	1	3	4.7619	15	23.8095	20	31.746	28	44.4444	1	12h regulations	4	2	2	4	1	has antiseptic action	1	Oral care package	1	2	no	2	1	12	1	hear	1	atomization	1	Yes	0
	32	63	1.96	7	11.1111	55	87.3016	1	3	4.7619	15	23.8095	20	31.746	28	44.4444	1	12h regulations	4	2	2	4	1	has antiseptic action	1	Oral care package	1	2	no	2	1	12	1	hear	1	atomization	1	Yes	0
	32	63	1.96	7	11.1111	55	87.3016	1	3	4.7619	15	23.8095	20	31.746	28	44.4444	1	12h regulations	4	2	2	4	1	has antiseptic action	1	Oral care package	1	2	no	2	1	12	1	hear	1	atomization	1	Yes	0
	32	63	1.96	7	11.1111	55	87.3016	1	3	4.7619	15	23.8095	20	31.746	28	44.4444	1	12h regulations	4	2	2	4	1	has antiseptic action	1	Oral care package	1	2	no	2	1	12	1	hear	1	atomization	1	Yes	0
Affiliated Hospital of Chengde Medical College	32	70	2.18	25	35.7143	44	62.8571	1	14	20	25	35.7143	27	38.5714	18	25.7143	1	12h regulations	4	2	3	4	1	has antiseptic action	1	Oral care package	1	2	no	3	1	16	1	hear	2	No atomization	1	Yes	0
	32	70	2.18	25	35.7143	44	62.8571	1	14	20	25	35.7143	27	38.5714	18	25.7143	1	12h regulations	4	2	3	4	1	has antiseptic action	1	Oral care package	1	2	no	3	1	16	1	hear	2	No atomization	1	Yes	1.67
	32	70	2.18	25	35.7143	44	62.8571	1	14	20	25	35.7143	27	38.5714	18	25.7143	1	12h regulations	4	2	3	4	1	has antiseptic action	1	Oral care package	1	2	no	3	1	16	1	hear	2	No atomization	1	Yes	3.24
	32	70	2.18	25	35.7143	44	62.8571	1	14	20	25	35.7143	27	38.5714	18	25.7143	1	12h regulations	4	2	3	4	1	has antiseptic action	1	Oral care package	1	2	no	3	1	16	1	hear	2	No atomization	1	Yes	1.78
	32	70	2.18	25	35.7143	44	62.8571	1	14	20	25	35.7143	27	38.5714	18	25.7143	1	12h regulations	4	2	3	4	1	has antiseptic action	1	Oral care package	1	2	no	3	1	16	1	hear	2	No atomization	1	Yes	0
	32	70	2.18	25	35.7143	44	62.8571	1	14	20	25	35.7143	27	38.5714	18	25.7143	1	12h regulations	4	2	3	4	1	has antiseptic action	1	Oral care package	1	2	no	3	1	16	1	hear	2	No atomization	1	Yes	1.86
	32	70	2.18	25	35.7143	44	62.8571	1	14	20	25	35.7143	27	38.5714	18	25.7143	1	12h regulations	4	2	3	4	1	has antiseptic action	1	Oral care package	1	2	no	3	1	16	1	hear	2	No atomization	1	Yes	3.99
	32	70	2.18	25	35.7143	44	62.8571	1	14	20	25	35.7143	27	38.5714	18	25.7143	1	12h regulations	4	2	3	4	1	has antiseptic action	1	Oral care package	1	2	no	3	1	16	1	hear	2	No atomization	1	Yes	13.54
	32	70	2.18	25	35.7143	44	62.8571	1	14	20	25	35.7143	27	38.5714	18	25.7143	1	12h regulations	4	2	3	4	1	has antiseptic action	1	Oral care package	1	2	no	3	1	16	1	hear	2	No atomization	1	Yes	1.57
	32	70	2.18	25	35.7143	44	62.8571	1	14	20	25	35.7143	27	38.5714	18	25.7143	1	12h regulations	4	2	3	4	1	has antiseptic action	1	Oral care package	1	2	no	3	1	16	1	hear	2	No atomization	1	Yes	1.37
	32	70	2.18	25	35.7143	44	62.8571	1	14	20	25	35.7143	27	38.5714	18	25.7143	1	12h regulations	4	2	3	4	1	has antiseptic action	1	Oral care package	1	2	no	3	1	16	1	hear	2	No atomization	1	Yes	0
	32	70	2.18	25	35.7143	44	62.8571	1	14	20	25	35.7143	27	38.5714	18	25.7143	1	12h regulations	4	2	3	4	1	has antiseptic action	1	Oral care package	1	2	no	3	1	16	1	hear	2	No atomization	1	Yes	4.44
Xingtai People's Hospital	15	48	3.2	3	6.25	43	89.5833	2	2	4.16667	28	58.3333	12	25	8	16.6667	1	12h regulations	4	2	3	3	2	no antiseptic action	1	Oral care package	1	2	no	4	1	16	1	hear	2	No atomization	1	Yes	35.7
	15	48	3.2	3	6.25	43	89.5833	2	2	4.16667	28	58.3333	12	25	8	16.6667	1	12h regulations	4	2	3	3	2	no antiseptic action	1	Oral care package	1	2	no	4	1	16	1	hear	2	No atomization	1	Yes	35.6
	15	48	3.2	3	6.25	43	89.5833	2	2	4.16667	28	58.3333	12	25	8	16.6667	1	12h regulations	4	2	3	3	2	no antiseptic action	1	Oral care package	1	2	no	4	1	16	1	hear	2	No atomization	1	Yes	37.8
	15	48	3.2	3	6.25	43	89.5833	2	2	4.16667	28	58.3333	12	25	8	16.6667	1	12h regulations	4	2	3	3	2	no antiseptic action	1	Oral care package	1	2	no	4	1	16	1	hear	2	No atomization	1	Yes	43.2
	15	48	3.2	3	6.25	43	89.5833	2	2	4.16667	28	58.3333	12	25	8	16.6667	1	12h regulations	4	2	3	3	2	no antiseptic action	1	Oral care package	1	2	no	4	1	16	1	hear	2	No atomization	1	Yes	43.5
	15	48	3.2	3	6.25	43	89.5833	2	2	4.16667	28	58.3333	12	25	8	16.6667	1	12h regulations	4	2	3	3	2	no antiseptic action	1	Oral care package	1	2	no	4	1	16	1	hear	2	No atomization	1	Yes	38
	15	48	3.2	3	6.25	43	89.5833	2	2	4.16667	28	58.3333	12	25	8	16.6667	1	12h regulations	4	2	3	3	2	no antiseptic action	1	Oral care package	1	2	no	4	1	16	1	hear	2	No atomization	1	Yes	23
	15	48	3.2	3	6.25	43	89.5833	2	2	4.16667	28	58.3333	12	25	8	16.6667	1	12h regulations	4	2	3	3	2	no antiseptic action	1	Oral care package	1	2	no	4	1	16	1	hear	2	No atomization	1	Yes	20.6
	15	48	3.2	3	6.25	43	89.5833	2	2	4.16667	28	58.3333	12	25	8	16.6667	1	12h regulations	4	2	3	3	2	no antiseptic action	1	Oral care package	1	2	no	4	1	16	1	hear	2	No atomization	1	Yes	19.6
	15	48	3.2	3	6.25	43	89.5833	2	2	4.16667	28	58.3333	12	25	8	16.6667	1	12h regulations	4	2	3	3	2	no antiseptic action	1	Oral care package	1	2	no	4	1	16	1	hear	2	No atomization	1	Yes	19.9
	15	48	3.2	3	6.25	43	89.5833	2	2	4.16667	28	58.3333	12	25	8	16.6667	1	12h regulations	4	2	3	3	2	no antiseptic action	1	Oral care package	1	2	no	4	1	16	1	hear	2	No atomization	1	Yes	29.1
	15	48	3.2	3	6.25	43	89.5833	2	2	4.16667	28	58.3333	12	25	8	16.6667	1	12h regulations	4	2	3	3	2	no antiseptic action	1	Oral care package	1	2	no	4	1	16	1	hear	2	No atomization	1	Yes	23.3
Baoding City First Hospital	9	22	2.44	1	4.54545	21	95.4545	0	4	18.1818	2	9.09091	20	90.9091	0	0	1	12h regulations	4	1	2	3	1	has antiseptic action	1	Oral care package	1	2	no	2	1	12	1	hear	1	atomization	1	Yes	6.66
	9	22	2.44	1	4.54545	21	95.4545	0	4	18.1818	2	9.09091	20	90.9091	0	0	1	12h regulations	4	1	2	3	1	has antiseptic action	1	Oral care package	1	2	no	2	1	12	1	hear	1	atomization	1	Yes	15.1
	9	22	2.44	1	4.54545	21	95.4545	0	4	18.1818	2	9.09091	20	90.9091	0	0	1	12h regulations	4	1	2	3	1	has antiseptic action	1	Oral care package	1	2	no	2	1	12	1	hear	1	atomization	1	Yes	0
	9	22	2.44	1	4.54545	21	95.4545	0	4	18.1818	2	9.09091	20	90.9091	0	0	1	12h regulations	4	1	2	3	1	has antiseptic action	1	Oral care package	1	2	no	2	1	12	1	hear	1	atomization	1	Yes	0
	9	22	2.44	1	4.54545	21	95.4545	0	4	18.1818	2	9.09091	20	90.9091	0	0	1	12h regulations	4	1	2	3	1	has antiseptic action	1	Oral care package	1	2	no	2	1	12	1	hear	1	atomization	1	Yes	21.5
	9	22	2.44	1	4.54545	21	95.4545	0	4	18.1818	2	9.09091	20	90.9091	0	0	1	12h regulations	4	1	2	3	1	has antiseptic action	1	Oral care package	1	2	no	2	1	12	1	hear	1	atomization	1	Yes	0
	9	22	2.44	1	4.54545	21	95.4545	0	4	18.1818	2	9.09091	20	90.9091	0	0	1	12h regulations	4	1	2	3	1	has antiseptic action	1	Oral care package	1	2	no	2	1	12	1	hear	1	atomization	1	Yes	0
	9	22	2.44	1	4.54545	21	95.4545	0	4	18.1818	2	9.09091	20	90.9091	0	0	1	12h regulations	4	1	2	3	1	has antiseptic action	1	Oral care package	1	2	no	2	1	12	1	hear	1	atomization	1	Yes	0
	9	22	2.44	1	4.54545	21	95.4545	0	4	18.1818	2	9.09091	20	90.9091	0	0	1	12h regulations	4	1	2	3	1	has antiseptic action	1	Oral care package	1	2	no	2	1	12	1	hear	1	atomization	1	Yes	0
	9	22	2.44	1	4.54545	21	95.4545	0	4	18.1818	2	9.09091	20	90.9091	0	0	1	12h regulations	4	1	2	3	1	has antiseptic action	1	Oral care package	1	2	no	2	1	12	1	hear	1	atomization	1	Yes	17.2
	9	22	2.44	1	4.54545	21	95.4545	0	4	18.1818	2	9.09091	20	90.9091	0	0	1	12h regulations	4	1	2	3	1	has antiseptic action	1	Oral care package	1	2	no	2	1	12	1	hear	1	atomization	1	Yes	0
	9	22	2.44	1	4.54545	21	95.4545	0	4	18.1818	2	9.09091	20	90.9091	0	0	1	12h regulations	4	1	2	3	1	has antiseptic action	1	Oral care package	1	2	no	2	1	12	1	hear	1	atomization	1	Yes	0
Tangshan gongren Hospital	18	55	3.05	1	1.81818	53	96.3636	1	1	1.81818	6	10.9091	21	38.1818	28	50.9091	2	8h regulations	5	2	2	3	1	has antiseptic action	1	Oral care package	1	1	yes	3	1	12	1	hear	1	atomization	1	Yes	4.44
	18	55	3.05	1	1.81818	53	96.3636	1	1	1.81818	6	10.9091	21	38.1818	28	50.9091	2	8h regulations	5	2	2	3	1	has antiseptic action	1	Oral care package	1	1	yes	3	1	12	1	hear	1	atomization	1	Yes	6.29
	18	55	3.05	1	1.81818	53	96.3636	1	1	1.81818	6	10.9091	21	38.1818	28	50.9091	2	8h regulations	5	2	2	3	1	has antiseptic action	1	Oral care package	1	1	yes	3	1	12	1	hear	1	atomization	1	Yes	0
	18	55	3.05	1	1.81818	53	96.3636	1	1	1.81818	6	10.9091	21	38.1818	28	50.9091	2	8h regulations	5	2	2	3	1	has antiseptic action	1	Oral care package	1	1	yes	3	1	12	1	hear	1	atomization	1	Yes	12.58
	18	55	3.05	1	1.81818	53	96.3636	1	1	1.81818	6	10.9091	21	38.1818	28	50.9091	2	8h regulations	5	2	2	3	1	has antiseptic action	1	Oral care package	1	1	yes	3	1	12	1	hear	1	atomization	1	Yes	0
	18	55	3.05	1	1.81818	53	96.3636	1	1	1.81818	6	10.9091	21	38.1818	28	50.9091	2	8h regulations	5	2	2	3	1	has antiseptic action	1	Oral care package	1	1	yes	3	1	12	1	hear	1	atomization	1	Yes	14.29
	18	55	3.05	1	1.81818	53	96.3636	1	1	1.81818	6	10.9091	21	38.1818	28	50.9091	2	8h regulations	5	2	2	3	1	has antiseptic action	1	Oral care package	1	1	yes	3	1	12	1	hear	1	atomization	1	Yes	25.64
	18	55	3.05	1	1.81818	53	96.3636	1	1	1.81818	6	10.9091	21	38.1818	28	50.9091	2	8h regulations	5	2	2	3	1	has antiseptic action	1	Oral care package	1	1	yes	3	1	12	1	hear	1	atomization	1	Yes	7.52
	18	55	3.05	1	1.81818	53	96.3636	1	1	1.81818	6	10.9091	21	38.1818	28	50.9091	2	8h regulations	5	2	2	3	1	has antiseptic action	1	Oral care package	1	1	yes	3	1	12	1	hear	1	atomization	1	Yes	0
	18	55	3.05	1	1.81818	53	96.3636	1	1	1.81818	6	10.9091	21	38.1818	28	50.9091	2	8h regulations	5	2	2	3	1	has antiseptic action	1	Oral care package	1	1	yes	3	1	12	1	hear	1	atomization	1	Yes	10.49
	18	55	3.05	1	1.81818	53	96.3636	1	1	1.81818	6	10.9091	21	38.1818	28	50.9091	2	8h regulations	5	2	2	3	1	has antiseptic action	1	Oral care package	1	1	yes	3	1	12	1	hear	1	atomization	1	Yes	12.88
	18	55	3.05	1	1.81818	53	96.3636	1	1	1.81818	6	10.9091	21	38.1818	28	50.9091	2	8h regulations	5	2	2	3	1	has antiseptic action	1	Oral care package	1	1	yes	3	1	12	1	hear	1	atomization	1	Yes	4.42
Kailuan General Hospital	13	39	3	26	66.6667	13	33.3333	0	2	5.12821	26	66.6667	10	25.641	3	7.69231	1	12h regulations	5	2	2	4	1	has antiseptic action	1	Oral care package	1	1	yes	2	1	14	1	hear	1	atomization	1	Yes	0
	13	39	3	26	66.6667	13	33.3333	0	2	5.12821	26	66.6667	10	25.641	3	7.69231	1	12h regulations	5	2	2	4	1	has antiseptic action	1	Oral care package	1	1	yes	2	1	14	1	hear	1	atomization	1	Yes	0
	13	39	3	26	66.6667	13	33.3333	0	2	5.12821	26	66.6667	10	25.641	3	7.69231	1	12h regulations	5	2	2	4	1	has antiseptic action	1	Oral care package	1	1	yes	2	1	14	1	hear	1	atomization	1	Yes	0
	13	39	3	26	66.6667	13	33.3333	0	2	5.12821	26	66.6667	10	25.641	3	7.69231	1	12h regulations	5	2	2	4	1	has antiseptic action	1	Oral care package	1	1	yes	2	1	14	1	hear	1	atomization	1	Yes	0
	13	39	3	26	66.6667	13	33.3333	0	2	5.12821	26	66.6667	10	25.641	3	7.69231	1	12h regulations	5	2	2	4	1	has antiseptic action	1	Oral care package	1	1	yes	2	1	14	1	hear	1	atomization	1	Yes	4.76
	13	39	3	26	66.6667	13	33.3333	0	2	5.12821	26	66.6667	10	25.641	3	7.69231	1	12h regulations	5	2	2	4	1	has antiseptic action	1	Oral care package	1	1	yes	2	1	14	1	hear	1	atomization	1	Yes	0
	13	39	3	26	66.6667	13	33.3333	0	2	5.12821	26	66.6667	10	25.641	3	7.69231	1	12h regulations	5	2	2	4	1	has antiseptic action	1	Oral care package	1	1	yes	2	1	14	1	hear	1	atomization	1	Yes	0
	13	39	3	26	66.6667	13	33.3333	0	2	5.12821	26	66.6667	10	25.641	3	7.69231	1	12h regulations	5	2	2	4	1	has antiseptic action	1	Oral care package	1	1	yes	2	1	14	1	hear	1	atomization	1	Yes	0
	13	39	3	26	66.6667	13	33.3333	0	2	5.12821	26	66.6667	10	25.641	3	7.69231	1	12h regulations	5	2	2	4	1	has antiseptic action	1	Oral care package	1	1	yes	2	1	14	1	hear	1	atomization	1	Yes	0
	13	39	3	26	66.6667	13	33.3333	0	2	5.12821	26	66.6667	10	25.641	3	7.69231	1	12h regulations	5	2	2	4	1	has antiseptic action	1	Oral care package	1	1	yes	2	1	14	1	hear	1	atomization	1	Yes	0
	13	39	3	26	66.6667	13	33.3333	0	2	5.12821	26	66.6667	10	25.641	3	7.69231	1	12h regulations	5	2	2	4	1	has antiseptic action	1	Oral care package	1	1	yes	2	1	14	1	hear	1	atomization	1	Yes	6.8
	13	39	3	26	66.6667	13	33.3333	0	2	5.12821	26	66.6667	10	25.641	3	7.69231	1	12h regulations	5	2	2	4	1	has antiseptic action	1	Oral care package	1	1	yes	2	1	14	1	hear	1	atomization	1	Yes	0
Xingtai Third Hospital	12	32	2.66	14	43.75	16	50	2	8	25	10	31.25	14	43.75	9	28.125	2	8h regulations	4	3	4	4	1	has antiseptic action	1	Oral care package	1	2	no	6	1	12	1	hear	2	No atomization	1	Yes	0
	12	32	2.66	14	43.75	16	50	2	8	25	10	31.25	14	43.75	9	28.125	2	8h regulations	4	3	4	4	1	has antiseptic action	1	Oral care package	1	2	no	6	1	12	1	hear	2	No atomization	1	Yes	0
	12	32	2.66	14	43.75	16	50	2	8	25	10	31.25	14	43.75	9	28.125	2	8h regulations	4	3	4	4	1	has antiseptic action	1	Oral care package	1	2	no	6	1	12	1	hear	2	No atomization	1	Yes	0
	12	32	2.66	14	43.75	16	50	2	8	25	10	31.25	14	43.75	9	28.125	2	8h regulations	4	3	4	4	1	has antiseptic action	1	Oral care package	1	2	no	6	1	12	1	hear	2	No atomization	1	Yes	0
	12	32	2.66	14	43.75	16	50	2	8	25	10	31.25	14	43.75	9	28.125	2	8h regulations	4	3	4	4	1	has antiseptic action	1	Oral care package	1	2	no	6	1	12	1	hear	2	No atomization	1	Yes	0
	12	32	2.66	14	43.75	16	50	2	8	25	10	31.25	14	43.75	9	28.125	2	8h regulations	4	3	4	4	1	has antiseptic action	1	Oral care package	1	2	no	6	1	12	1	hear	2	No atomization	1	Yes	0
	12	32	2.66	14	43.75	16	50	2	8	25	10	31.25	14	43.75	9	28.125	2	8h regulations	4	3	4	4	1	has antiseptic action	1	Oral care package	1	2	no	6	1	12	1	hear	2	No atomization	1	Yes	0
	12	32	2.66	14	43.75	16	50	2	8	25	10	31.25	14	43.75	9	28.125	2	8h regulations	4	3	4	4	1	has antiseptic action	1	Oral care package	1	2	no	6	1	12	1	hear	2	No atomization	1	Yes	0
	12	32	2.66	14	43.75	16	50	2	8	25	10	31.25	14	43.75	9	28.125	2	8h regulations	4	3	4	4	1	has antiseptic action	1	Oral care package	1	2	no	6	1	12	1	hear	2	No atomization	1	Yes	0
	12	32	2.66	14	43.75	16	50	2	8	25	10	31.25	14	43.75	9	28.125	2	8h regulations	4	3	4	4	1	has antiseptic action	1	Oral care package	1	2	no	6	1	12	1	hear	2	No atomization	1	Yes	0
	12	32	2.66	14	43.75	16	50	2	8	25	10	31.25	14	43.75	9	28.125	2	8h regulations	4	3	4	4	1	has antiseptic action	1	Oral care package	1	2	no	6	1	12	1	hear	2	No atomization	1	Yes	0
	12	32	2.66	14	43.75	16	50	2	8	25	10	31.25	14	43.75	9	28.125	2	8h regulations	4	3	4	4	1	has antiseptic action	1	Oral care package	1	2	no	6	1	12	1	hear	2	No atomization	1	Yes	0
Baoding Second Hospital	13	37	2.84	9	24.3243	26	70.2703	2	1	2.7027	20	54.0541	13	35.1351	2	5.40541	1	12h regulations	4	1	1	4	1	has antiseptic action	1	Oral care package	1	2	no	6	2	16	2	no hear	1	atomization	2	No	2.6
	13	37	2.84	9	24.3243	26	70.2703	2	1	2.7027	20	54.0541	13	35.1351	2	5.40541	1	12h regulations	4	1	1	4	1	has antiseptic action	1	Oral care package	1	2	no	6	2	16	2	no hear	1	atomization	2	No	0
	13	37	2.84	9	24.3243	26	70.2703	2	1	2.7027	20	54.0541	13	35.1351	2	5.40541	1	12h regulations	4	1	1	4	1	has antiseptic action	1	Oral care package	1	2	no	6	2	16	2	no hear	1	atomization	2	No	2.4
	13	37	2.84	9	24.3243	26	70.2703	2	1	2.7027	20	54.0541	13	35.1351	2	5.40541	1	12h regulations	4	1	1	4	1	has antiseptic action	1	Oral care package	1	2	no	6	2	16	2	no hear	1	atomization	2	No	9.9
	13	37	2.84	9	24.3243	26	70.2703	2	1	2.7027	20	54.0541	13	35.1351	2	5.40541	1	12h regulations	4	1	1	4	1	has antiseptic action	1	Oral care package	1	2	no	6	2	16	2	no hear	1	atomization	2	No	10.6
	13	37	2.84	9	24.3243	26	70.2703	2	1	2.7027	20	54.0541	13	35.1351	2	5.40541	1	12h regulations	4	1	1	4	1	has antiseptic action	1	Oral care package	1	2	no	6	2	16	2	no hear	1	atomization	2	No	0
	13	37	2.84	9	24.3243	26	70.2703	2	1	2.7027	20	54.0541	13	35.1351	2	5.40541	1	12h regulations	4	1	1	4	1	has antiseptic action	1	Oral care package	1	2	no	6	2	16	2	no hear	1	atomization	2	No	9.6
	13	37	2.84	9	24.3243	26	70.2703	2	1	2.7027	20	54.0541	13	35.1351	2	5.40541	1	12h regulations	4	1	1	4	1	has antiseptic action	1	Oral care package	1	2	no	6	2	16	2	no hear	1	atomization	2	No	0
	13	37	2.84	9	24.3243	26	70.2703	2	1	2.7027	20	54.0541	13	35.1351	2	5.40541	1	12h regulations	4	1	1	4	1	has antiseptic action	1	Oral care package	1	2	no	6	2	16	2	no hear	1	atomization	2	No	17.6
	13	37	2.84	9	24.3243	26	70.2703	2	1	2.7027	20	54.0541	13	35.1351	2	5.40541	1	12h regulations	4	1	1	4	1	has antiseptic action	1	Oral care package	1	2	no	6	2	16	2	no hear	1	atomization	2	No	9.8
	13	37	2.84	9	24.3243	26	70.2703	2	1	2.7027	20	54.0541	13	35.1351	2	5.40541	1	12h regulations	4	1	1	4	1	has antiseptic action	1	Oral care package	1	2	no	6	2	16	2	no hear	1	atomization	2	No	6.6
	13	37	2.84	9	24.3243	26	70.2703	2	1	2.7027	20	54.0541	13	35.1351	2	5.40541	1	12h regulations	4	1	1	4	1	has antiseptic action	1	Oral care package	1	2	no	6	2	16	2	no hear	1	atomization	2	No	13.3
Tangshan Union Medical College Hospital	9	17	1.88	9	52.9412	8	47.0588	0	1	5.88235	5	29.4118	9	52.9412	3	17.6471	1	12h regulations	4	3	3	3	1	has antiseptic action	2	Mouth care toothbrush	4	1	yes	3	1	12	2	no hear	2	No atomization	2	No	0
	9	17	1.88	9	52.9412	8	47.0588	0	1	5.88235	5	29.4118	9	52.9412	3	17.6471	1	12h regulations	4	3	3	3	1	has antiseptic action	2	Mouth care toothbrush	4	1	yes	3	1	12	2	no hear	2	No atomization	2	No	0
	9	17	1.88	9	52.9412	8	47.0588	0	1	5.88235	5	29.4118	9	52.9412	3	17.6471	1	12h regulations	4	3	3	3	1	has antiseptic action	2	Mouth care toothbrush	4	1	yes	3	1	12	2	no hear	2	No atomization	2	No	0
	9	17	1.88	9	52.9412	8	47.0588	0	1	5.88235	5	29.4118	9	52.9412	3	17.6471	1	12h regulations	4	3	3	3	1	has antiseptic action	2	Mouth care toothbrush	4	1	yes	3	1	12	2	no hear	2	No atomization	2	No	0
	9	17	1.88	9	52.9412	8	47.0588	0	1	5.88235	5	29.4118	9	52.9412	3	17.6471	1	12h regulations	4	3	3	3	1	has antiseptic action	2	Mouth care toothbrush	4	1	yes	3	1	12	2	no hear	2	No atomization	2	No	11.49
	9	17	1.88	9	52.9412	8	47.0588	0	1	5.88235	5	29.4118	9	52.9412	3	17.6471	1	12h regulations	4	3	3	3	1	has antiseptic action	2	Mouth care toothbrush	4	1	yes	3	1	12	2	no hear	2	No atomization	2	No	0
	9	17	1.88	9	52.9412	8	47.0588	0	1	5.88235	5	29.4118	9	52.9412	3	17.6471	1	12h regulations	4	3	3	3	1	has antiseptic action	2	Mouth care toothbrush	4	1	yes	3	1	12	2	no hear	2	No atomization	2	No	0
	9	17	1.88	9	52.9412	8	47.0588	0	1	5.88235	5	29.4118	9	52.9412	3	17.6471	1	12h regulations	4	3	3	3	1	has antiseptic action	2	Mouth care toothbrush	4	1	yes	3	1	12	2	no hear	2	No atomization	2	No	0
	9	17	1.88	9	52.9412	8	47.0588	0	1	5.88235	5	29.4118	9	52.9412	3	17.6471	1	12h regulations	4	3	3	3	1	has antiseptic action	2	Mouth care toothbrush	4	1	yes	3	1	12	2	no hear	2	No atomization	2	No	0
	9	17	1.88	9	52.9412	8	47.0588	0	1	5.88235	5	29.4118	9	52.9412	3	17.6471	1	12h regulations	4	3	3	3	1	has antiseptic action	2	Mouth care toothbrush	4	1	yes	3	1	12	2	no hear	2	No atomization	2	No	0
	9	17	1.88	9	52.9412	8	47.0588	0	1	5.88235	5	29.4118	9	52.9412	3	17.6471	1	12h regulations	4	3	3	3	1	has antiseptic action	2	Mouth care toothbrush	4	1	yes	3	1	12	2	no hear	2	No atomization	2	No	0
	9	17	1.88	9	52.9412	8	47.0588	0	1	5.88235	5	29.4118	9	52.9412	3	17.6471	1	12h regulations	4	3	3	3	1	has antiseptic action	2	Mouth care toothbrush	4	1	yes	3	1	12	2	no hear	2	No atomization	2	No	0
Hebei Energy Xingtai Mining Group General Hospital	6	18	3	7	38.8889	11	61.1111	0	6	33.3333	8	44.4444	9	50	1	5.55556	2	8h regulations	2.5	3	4	4	2	no antiseptic action	1	Oral care package	1	2	no	3	1	12	1	hear	2	No atomization	1	Yes	23.26
	6	18	3	7	38.8889	11	61.1111	0	6	33.3333	8	44.4444	9	50	1	5.55556	2	8h regulations	2.5	3	4	4	2	no antiseptic action	1	Oral care package	1	2	no	3	1	12	1	hear	2	No atomization	1	Yes	17.86
	6	18	3	7	38.8889	11	61.1111	0	6	33.3333	8	44.4444	9	50	1	5.55556	2	8h regulations	2.5	3	4	4	2	no antiseptic action	1	Oral care package	1	2	no	3	1	12	1	hear	2	No atomization	1	Yes	0
	6	18	3	7	38.8889	11	61.1111	0	6	33.3333	8	44.4444	9	50	1	5.55556	2	8h regulations	2.5	3	4	4	2	no antiseptic action	1	Oral care package	1	2	no	3	1	12	1	hear	2	No atomization	1	Yes	0
	6	18	3	7	38.8889	11	61.1111	0	6	33.3333	8	44.4444	9	50	1	5.55556	2	8h regulations	2.5	3	4	4	2	no antiseptic action	1	Oral care package	1	2	no	3	1	12	1	hear	2	No atomization	1	Yes	20.83
	6	18	3	7	38.8889	11	61.1111	0	6	33.3333	8	44.4444	9	50	1	5.55556	2	8h regulations	2.5	3	4	4	2	no antiseptic action	1	Oral care package	1	2	no	3	1	12	1	hear	2	No atomization	1	Yes	18.18
	6	18	3	7	38.8889	11	61.1111	0	6	33.3333	8	44.4444	9	50	1	5.55556	2	8h regulations	2.5	3	4	4	2	no antiseptic action	1	Oral care package	1	2	no	3	1	12	1	hear	2	No atomization	1	Yes	0
	6	18	3	7	38.8889	11	61.1111	0	6	33.3333	8	44.4444	9	50	1	5.55556	2	8h regulations	2.5	3	4	4	2	no antiseptic action	1	Oral care package	1	2	no	3	1	12	1	hear	2	No atomization	1	Yes	19.23
	6	18	3	7	38.8889	11	61.1111	0	6	33.3333	8	44.4444	9	50	1	5.55556	2	8h regulations	2.5	3	4	4	2	no antiseptic action	1	Oral care package	1	2	no	3	1	12	1	hear	2	No atomization	1	Yes	0
	6	18	3	7	38.8889	11	61.1111	0	6	33.3333	8	44.4444	9	50	1	5.55556	2	8h regulations	2.5	3	4	4	2	no antiseptic action	1	Oral care package	1	2	no	3	1	12	1	hear	2	No atomization	1	Yes	16.67
	6	18	3	7	38.8889	11	61.1111	0	6	33.3333	8	44.4444	9	50	1	5.55556	2	8h regulations	2.5	3	4	4	2	no antiseptic action	1	Oral care package	1	2	no	3	1	12	1	hear	2	No atomization	1	Yes	18.52
	6	18	3	7	38.8889	11	61.1111	0	6	33.3333	8	44.4444	9	50	1	5.55556	2	8h regulations	2.5	3	4	4	2	no antiseptic action	1	Oral care package	1	2	no	3	1	12	1	hear	2	No atomization	1	Yes	64.52
Hebei Civil Affairs General Hospital	5	10	2	5	50	5	50	0	3	30	2	20	6	60	2	20	1	12h regulations	4	2	2	3	2	no antiseptic action	2	Mouth care toothbrush	4	2	no	6	1	16	1	hear	2	No atomization	1	Yes	0
	5	10	2	5	50	5	50	0	3	30	2	20	6	60	2	20	1	12h regulations	4	2	2	3	2	no antiseptic action	2	Mouth care toothbrush	4	2	no	6	1	16	1	hear	2	No atomization	1	Yes	0
	5	10	2	5	50	5	50	0	3	30	2	20	6	60	2	20	1	12h regulations	4	2	2	3	2	no antiseptic action	2	Mouth care toothbrush	4	2	no	6	1	16	1	hear	2	No atomization	1	Yes	2.76
	5	10	2	5	50	5	50	0	3	30	2	20	6	60	2	20	1	12h regulations	4	2	2	3	2	no antiseptic action	2	Mouth care toothbrush	4	2	no	6	1	16	1	hear	2	No atomization	1	Yes	0
	5	10	2	5	50	5	50	0	3	30	2	20	6	60	2	20	1	12h regulations	4	2	2	3	2	no antiseptic action	2	Mouth care toothbrush	4	2	no	6	1	16	1	hear	2	No atomization	1	Yes	0
	5	10	2	5	50	5	50	0	3	30	2	20	6	60	2	20	1	12h regulations	4	2	2	3	2	no antiseptic action	2	Mouth care toothbrush	4	2	no	6	1	16	1	hear	2	No atomization	1	Yes	0
	5	10	2	5	50	5	50	0	3	30	2	20	6	60	2	20	1	12h regulations	4	2	2	3	2	no antiseptic action	2	Mouth care toothbrush	4	2	no	6	1	16	1	hear	2	No atomization	1	Yes	0
	5	10	2	5	50	5	50	0	3	30	2	20	6	60	2	20	1	12h regulations	4	2	2	3	2	no antiseptic action	2	Mouth care toothbrush	4	2	no	6	1	16	1	hear	2	No atomization	1	Yes	0
	5	10	2	5	50	5	50	0	3	30	2	20	6	60	2	20	1	12h regulations	4	2	2	3	2	no antiseptic action	2	Mouth care toothbrush	4	2	no	6	1	16	1	hear	2	No atomization	1	Yes	2.81
	5	10	2	5	50	5	50	0	3	30	2	20	6	60	2	20	1	12h regulations	4	2	2	3	2	no antiseptic action	2	Mouth care toothbrush	4	2	no	6	1	16	1	hear	2	No atomization	1	Yes	0
	5	10	2	5	50	5	50	0	3	30	2	20	6	60	2	20	1	12h regulations	4	2	2	3	2	no antiseptic action	2	Mouth care toothbrush	4	2	no	6	1	16	1	hear	2	No atomization	1	Yes	0
	5	10	2	5	50	5	50	0	3	30	2	20	6	60	2	20	1	12h regulations	4	2	2	3	2	no antiseptic action	2	Mouth care toothbrush	4	2	no	6	1	16	1	hear	2	No atomization	1	Yes	0
Baoding Second Central Hospital	18	37	2.05	17	45.9459	20	54.0541	0	2	5.40541	14	37.8378	20	54.0541	3	8.10811	1	12h regulations	4	2	3	2	2	no antiseptic action	1	Oral care package	1	1	yes	4	1	12	1	hear	1	atomization	1	Yes	13.82
	18	37	2.05	17	45.9459	20	54.0541	0	2	5.40541	14	37.8378	20	54.0541	3	8.10811	1	12h regulations	4	2	3	2	2	no antiseptic action	1	Oral care package	1	1	yes	4	1	12	1	hear	1	atomization	1	Yes	0
	18	37	2.05	17	45.9459	20	54.0541	0	2	5.40541	14	37.8378	20	54.0541	3	8.10811	1	12h regulations	4	2	3	2	2	no antiseptic action	1	Oral care package	1	1	yes	4	1	12	1	hear	1	atomization	1	Yes	0
	18	37	2.05	17	45.9459	20	54.0541	0	2	5.40541	14	37.8378	20	54.0541	3	8.10811	1	12h regulations	4	2	3	2	2	no antiseptic action	1	Oral care package	1	1	yes	4	1	12	1	hear	1	atomization	1	Yes	5.99
	18	37	2.05	17	45.9459	20	54.0541	0	2	5.40541	14	37.8378	20	54.0541	3	8.10811	1	12h regulations	4	2	3	2	2	no antiseptic action	1	Oral care package	1	1	yes	4	1	12	1	hear	1	atomization	1	Yes	19.42
	18	37	2.05	17	45.9459	20	54.0541	0	2	5.40541	14	37.8378	20	54.0541	3	8.10811	1	12h regulations	4	2	3	2	2	no antiseptic action	1	Oral care package	1	1	yes	4	1	12	1	hear	1	atomization	1	Yes	7.35
	18	37	2.05	17	45.9459	20	54.0541	0	2	5.40541	14	37.8378	20	54.0541	3	8.10811	1	12h regulations	4	2	3	2	2	no antiseptic action	1	Oral care package	1	1	yes	4	1	12	1	hear	1	atomization	1	Yes	0
	18	37	2.05	17	45.9459	20	54.0541	0	2	5.40541	14	37.8378	20	54.0541	3	8.10811	1	12h regulations	4	2	3	2	2	no antiseptic action	1	Oral care package	1	1	yes	4	1	12	1	hear	1	atomization	1	Yes	0
	18	37	2.05	17	45.9459	20	54.0541	0	2	5.40541	14	37.8378	20	54.0541	3	8.10811	1	12h regulations	4	2	3	2	2	no antiseptic action	1	Oral care package	1	1	yes	4	1	12	1	hear	1	atomization	1	Yes	24.1
	18	37	2.05	17	45.9459	20	54.0541	0	2	5.40541	14	37.8378	20	54.0541	3	8.10811	1	12h regulations	4	2	3	2	2	no antiseptic action	1	Oral care package	1	1	yes	4	1	12	1	hear	1	atomization	1	Yes	3.02
	18	37	2.05	17	45.9459	20	54.0541	0	2	5.40541	14	37.8378	20	54.0541	3	8.10811	1	12h regulations	4	2	3	2	2	no antiseptic action	1	Oral care package	1	1	yes	4	1	12	1	hear	1	atomization	1	Yes	10.63
	18	37	2.05	17	45.9459	20	54.0541	0	2	5.40541	14	37.8378	20	54.0541	3	8.10811	1	12h regulations	4	2	3	2	2	no antiseptic action	1	Oral care package	1	1	yes	4	1	12	1	hear	1	atomization	1	Yes	0
The First Hospital of Hebei Medical University	15	36	2.4	11	30.5556	24	66.6667	1	3	8.33333	19	52.7778	3	8.33333	12	33.3333	1	12h regulations	4	3	3	2	1	has antiseptic action	2	Mouth care toothbrush	4	1	yes	4	1	12	1	hear	1	atomization	1	Yes	18.78
	15	36	2.4	11	30.5556	24	66.6667	1	3	8.33333	19	52.7778	3	8.33333	12	33.3333	1	12h regulations	4	3	3	2	1	has antiseptic action	2	Mouth care toothbrush	4	1	yes	4	1	12	1	hear	1	atomization	1	Yes	24.29
	15	36	2.4	11	30.5556	24	66.6667	1	3	8.33333	19	52.7778	3	8.33333	12	33.3333	1	12h regulations	4	3	3	2	1	has antiseptic action	2	Mouth care toothbrush	4	1	yes	4	1	12	1	hear	1	atomization	1	Yes	6.33
	15	36	2.4	11	30.5556	24	66.6667	1	3	8.33333	19	52.7778	3	8.33333	12	33.3333	1	12h regulations	4	3	3	2	1	has antiseptic action	2	Mouth care toothbrush	4	1	yes	4	1	12	1	hear	1	atomization	1	Yes	10.58
	15	36	2.4	11	30.5556	24	66.6667	1	3	8.33333	19	52.7778	3	8.33333	12	33.3333	1	12h regulations	4	3	3	2	1	has antiseptic action	2	Mouth care toothbrush	4	1	yes	4	1	12	1	hear	1	atomization	1	Yes	0
	15	36	2.4	11	30.5556	24	66.6667	1	3	8.33333	19	52.7778	3	8.33333	12	33.3333	1	12h regulations	4	3	3	2	1	has antiseptic action	2	Mouth care toothbrush	4	1	yes	4	1	12	1	hear	1	atomization	1	Yes	6.9
	15	36	2.4	11	30.5556	24	66.6667	1	3	8.33333	19	52.7778	3	8.33333	12	33.3333	1	12h regulations	4	3	3	2	1	has antiseptic action	2	Mouth care toothbrush	4	1	yes	4	1	12	1	hear	1	atomization	1	Yes	30.61
	15	36	2.4	11	30.5556	24	66.6667	1	3	8.33333	19	52.7778	3	8.33333	12	33.3333	1	12h regulations	4	3	3	2	1	has antiseptic action	2	Mouth care toothbrush	4	1	yes	4	1	12	1	hear	1	atomization	1	Yes	21.98
	15	36	2.4	11	30.5556	24	66.6667	1	3	8.33333	19	52.7778	3	8.33333	12	33.3333	1	12h regulations	4	3	3	2	1	has antiseptic action	2	Mouth care toothbrush	4	1	yes	4	1	12	1	hear	1	atomization	1	Yes	17.02
	15	36	2.4	11	30.5556	24	66.6667	1	3	8.33333	19	52.7778	3	8.33333	12	33.3333	1	12h regulations	4	3	3	2	1	has antiseptic action	2	Mouth care toothbrush	4	1	yes	4	1	12	1	hear	1	atomization	1	Yes	14.98
	15	36	2.4	11	30.5556	24	66.6667	1	3	8.33333	19	52.7778	3	8.33333	12	33.3333	1	12h regulations	4	3	3	2	1	has antiseptic action	2	Mouth care toothbrush	4	1	yes	4	1	12	1	hear	1	atomization	1	Yes	11.72
	15	36	2.4	11	30.5556	24	66.6667	1	3	8.33333	19	52.7778	3	8.33333	12	33.3333	1	12h regulations	4	3	3	2	1	has antiseptic action	2	Mouth care toothbrush	4	1	yes	4	1	12	1	hear	1	atomization	1	Yes	21.01
The First Affiliated Hospital of Hebei North University	25	52	2.08	21	40.3846	31	59.6154	0	5	9.61538	40	76.9231	8	15.3846	3	5.76923	2	8h regulations	5	2	2	3	1	has antiseptic action	1	Oral care package	1	1	yes	3	1	14	1	hear	2	No atomization	1	Yes	0
	25	52	2.08	21	40.3846	31	59.6154	0	5	9.61538	40	76.9231	8	15.3846	3	5.76923	2	8h regulations	5	2	2	3	1	has antiseptic action	1	Oral care package	1	1	yes	3	1	14	1	hear	2	No atomization	1	Yes	0
	25	52	2.08	21	40.3846	31	59.6154	0	5	9.61538	40	76.9231	8	15.3846	3	5.76923	2	8h regulations	5	2	2	3	1	has antiseptic action	1	Oral care package	1	1	yes	3	1	14	1	hear	2	No atomization	1	Yes	9.71
	25	52	2.08	21	40.3846	31	59.6154	0	5	9.61538	40	76.9231	8	15.3846	3	5.76923	2	8h regulations	5	2	2	3	1	has antiseptic action	1	Oral care package	1	1	yes	3	1	14	1	hear	2	No atomization	1	Yes	0
	25	52	2.08	21	40.3846	31	59.6154	0	5	9.61538	40	76.9231	8	15.3846	3	5.76923	2	8h regulations	5	2	2	3	1	has antiseptic action	1	Oral care package	1	1	yes	3	1	14	1	hear	2	No atomization	1	Yes	0
	25	52	2.08	21	40.3846	31	59.6154	0	5	9.61538	40	76.9231	8	15.3846	3	5.76923	2	8h regulations	5	2	2	3	1	has antiseptic action	1	Oral care package	1	1	yes	3	1	14	1	hear	2	No atomization	1	Yes	0
	25	52	2.08	21	40.3846	31	59.6154	0	5	9.61538	40	76.9231	8	15.3846	3	5.76923	2	8h regulations	5	2	2	3	1	has antiseptic action	1	Oral care package	1	1	yes	3	1	14	1	hear	2	No atomization	1	Yes	0
	25	52	2.08	21	40.3846	31	59.6154	0	5	9.61538	40	76.9231	8	15.3846	3	5.76923	2	8h regulations	5	2	2	3	1	has antiseptic action	1	Oral care package	1	1	yes	3	1	14	1	hear	2	No atomization	1	Yes	0
	25	52	2.08	21	40.3846	31	59.6154	0	5	9.61538	40	76.9231	8	15.3846	3	5.76923	2	8h regulations	5	2	2	3	1	has antiseptic action	1	Oral care package	1	1	yes	3	1	14	1	hear	2	No atomization	1	Yes	14.49
	25	52	2.08	21	40.3846	31	59.6154	0	5	9.61538	40	76.9231	8	15.3846	3	5.76923	2	8h regulations	5	2	2	3	1	has antiseptic action	1	Oral care package	1	1	yes	3	1	14	1	hear	2	No atomization	1	Yes	0
	25	52	2.08	21	40.3846	31	59.6154	0	5	9.61538	40	76.9231	8	15.3846	3	5.76923	2	8h regulations	5	2	2	3	1	has antiseptic action	1	Oral care package	1	1	yes	3	1	14	1	hear	2	No atomization	1	Yes	0
	25	52	2.08	21	40.3846	31	59.6154	0	5	9.61538	40	76.9231	8	15.3846	3	5.76923	2	8h regulations	5	2	2	3	1	has antiseptic action	1	Oral care package	1	1	yes	3	1	14	1	hear	2	No atomization	1	Yes	0
The Second Affiliated Hospital of Hebei North University	10	19	1.9	0	0	19	100	0	1	5.26316	4	21.0526	10	52.6316	5	26.3158	1	12h regulations	4	2	2	3	2	no antiseptic action	1	Oral care package	1	1	yes	3	1	12	1	hear	2	No atomization	1	Yes	0
	10	19	1.9	0	0	19	100	0	1	5.26316	4	21.0526	10	52.6316	5	26.3158	1	12h regulations	4	2	2	3	2	no antiseptic action	1	Oral care package	1	1	yes	3	1	12	1	hear	2	No atomization	1	Yes	0
	10	19	1.9	0	0	19	100	0	1	5.26316	4	21.0526	10	52.6316	5	26.3158	1	12h regulations	4	2	2	3	2	no antiseptic action	1	Oral care package	1	1	yes	3	1	12	1	hear	2	No atomization	1	Yes	0
	10	19	1.9	0	0	19	100	0	1	5.26316	4	21.0526	10	52.6316	5	26.3158	1	12h regulations	4	2	2	3	2	no antiseptic action	1	Oral care package	1	1	yes	3	1	12	1	hear	2	No atomization	1	Yes	0
	10	19	1.9	0	0	19	100	0	1	5.26316	4	21.0526	10	52.6316	5	26.3158	1	12h regulations	4	2	2	3	2	no antiseptic action	1	Oral care package	1	1	yes	3	1	12	1	hear	2	No atomization	1	Yes	0
	10	19	1.9	0	0	19	100	0	1	5.26316	4	21.0526	10	52.6316	5	26.3158	1	12h regulations	4	2	2	3	2	no antiseptic action	1	Oral care package	1	1	yes	3	1	12	1	hear	2	No atomization	1	Yes	0
	10	19	1.9	0	0	19	100	0	1	5.26316	4	21.0526	10	52.6316	5	26.3158	1	12h regulations	4	2	2	3	2	no antiseptic action	1	Oral care package	1	1	yes	3	1	12	1	hear	2	No atomization	1	Yes	16.67
	10	19	1.9	0	0	19	100	0	1	5.26316	4	21.0526	10	52.6316	5	26.3158	1	12h regulations	4	2	2	3	2	no antiseptic action	1	Oral care package	1	1	yes	3	1	12	1	hear	2	No atomization	1	Yes	0
	10	19	1.9	0	0	19	100	0	1	5.26316	4	21.0526	10	52.6316	5	26.3158	1	12h regulations	4	2	2	3	2	no antiseptic action	1	Oral care package	1	1	yes	3	1	12	1	hear	2	No atomization	1	Yes	0
	10	19	1.9	0	0	19	100	0	1	5.26316	4	21.0526	10	52.6316	5	26.3158	1	12h regulations	4	2	2	3	2	no antiseptic action	1	Oral care package	1	1	yes	3	1	12	1	hear	2	No atomization	1	Yes	0
	10	19	1.9	0	0	19	100	0	1	5.26316	4	21.0526	10	52.6316	5	26.3158	1	12h regulations	4	2	2	3	2	no antiseptic action	1	Oral care package	1	1	yes	3	1	12	1	hear	2	No atomization	1	Yes	0
	10	19	1.9	0	0	19	100	0	1	5.26316	4	21.0526	10	52.6316	5	26.3158	1	12h regulations	4	2	2	3	2	no antiseptic action	1	Oral care package	1	1	yes	3	1	12	1	hear	2	No atomization	1	Yes	0
The Second Hospital of Hebei Medical University	11	34	3.09	0	0	34	100	0	5	14.7059	16	47.0588	10	29.4118	7	20.5882	1	12h regulations	5	2	2	3	2	no antiseptic action	3	Big cotton swab	4	2	no	6	1	12	1	hear	1	atomization	1	Yes	0
	11	34	3.09	0	0	34	100	0	5	14.7059	16	47.0588	10	29.4118	7	20.5882	1	12h regulations	5	2	2	3	2	no antiseptic action	3	Big cotton swab	4	2	no	6	1	12	1	hear	1	atomization	1	Yes	0
	11	34	3.09	0	0	34	100	0	5	14.7059	16	47.0588	10	29.4118	7	20.5882	1	12h regulations	5	2	2	3	2	no antiseptic action	3	Big cotton swab	4	2	no	6	1	12	1	hear	1	atomization	1	Yes	6.45
	11	34	3.09	0	0	34	100	0	5	14.7059	16	47.0588	10	29.4118	7	20.5882	1	12h regulations	5	2	2	3	2	no antiseptic action	3	Big cotton swab	4	2	no	6	1	12	1	hear	1	atomization	1	Yes	5.71
	11	34	3.09	0	0	34	100	0	5	14.7059	16	47.0588	10	29.4118	7	20.5882	1	12h regulations	5	2	2	3	2	no antiseptic action	3	Big cotton swab	4	2	no	6	1	12	1	hear	1	atomization	1	Yes	0
	11	34	3.09	0	0	34	100	0	5	14.7059	16	47.0588	10	29.4118	7	20.5882	1	12h regulations	5	2	2	3	2	no antiseptic action	3	Big cotton swab	4	2	no	6	1	12	1	hear	1	atomization	1	Yes	16
	11	34	3.09	0	0	34	100	0	5	14.7059	16	47.0588	10	29.4118	7	20.5882	1	12h regulations	5	2	2	3	2	no antiseptic action	3	Big cotton swab	4	2	no	6	1	12	1	hear	1	atomization	1	Yes	7.25
	11	34	3.09	0	0	34	100	0	5	14.7059	16	47.0588	10	29.4118	7	20.5882	1	12h regulations	5	2	2	3	2	no antiseptic action	3	Big cotton swab	4	2	no	6	1	12	1	hear	1	atomization	1	Yes	9.26
	11	34	3.09	0	0	34	100	0	5	14.7059	16	47.0588	10	29.4118	7	20.5882	1	12h regulations	5	2	2	3	2	no antiseptic action	3	Big cotton swab	4	2	no	6	1	12	1	hear	1	atomization	1	Yes	11.49
	11	34	3.09	0	0	34	100	0	5	14.7059	16	47.0588	10	29.4118	7	20.5882	1	12h regulations	5	2	2	3	2	no antiseptic action	3	Big cotton swab	4	2	no	6	1	12	1	hear	1	atomization	1	Yes	0
	11	34	3.09	0	0	34	100	0	5	14.7059	16	47.0588	10	29.4118	7	20.5882	1	12h regulations	5	2	2	3	2	no antiseptic action	3	Big cotton swab	4	2	no	6	1	12	1	hear	1	atomization	1	Yes	6.62
	11	34	3.09	0	0	34	100	0	5	14.7059	16	47.0588	10	29.4118	7	20.5882	1	12h regulations	5	2	2	3	2	no antiseptic action	3	Big cotton swab	4	2	no	6	1	12	1	hear	1	atomization	1	Yes	0
Cangzhou Central Hospital	11	28	2.54	12	42.8571	16	57.1429	0	5	17.8571	8	28.5714	9	32.1429	11	39.2857	1	12h regulations	4	2	2	4	1	has antiseptic action	2	Mouth care toothbrush	4	2	no	4	1	12	1	hear	1	atomization	2	No	0
	11	28	2.54	12	42.8571	16	57.1429	0	5	17.8571	8	28.5714	9	32.1429	11	39.2857	1	12h regulations	4	2	2	4	1	has antiseptic action	2	Mouth care toothbrush	4	2	no	4	1	12	1	hear	1	atomization	2	No	0
	11	28	2.54	12	42.8571	16	57.1429	0	5	17.8571	8	28.5714	9	32.1429	11	39.2857	1	12h regulations	4	2	2	4	1	has antiseptic action	2	Mouth care toothbrush	4	2	no	4	1	12	1	hear	1	atomization	2	No	0
	11	28	2.54	12	42.8571	16	57.1429	0	5	17.8571	8	28.5714	9	32.1429	11	39.2857	1	12h regulations	4	2	2	4	1	has antiseptic action	2	Mouth care toothbrush	4	2	no	4	1	12	1	hear	1	atomization	2	No	0
	11	28	2.54	12	42.8571	16	57.1429	0	5	17.8571	8	28.5714	9	32.1429	11	39.2857	1	12h regulations	4	2	2	4	1	has antiseptic action	2	Mouth care toothbrush	4	2	no	4	1	12	1	hear	1	atomization	2	No	0
	11	28	2.54	12	42.8571	16	57.1429	0	5	17.8571	8	28.5714	9	32.1429	11	39.2857	1	12h regulations	4	2	2	4	1	has antiseptic action	2	Mouth care toothbrush	4	2	no	4	1	12	1	hear	1	atomization	2	No	9.43
	11	28	2.54	12	42.8571	16	57.1429	0	5	17.8571	8	28.5714	9	32.1429	11	39.2857	1	12h regulations	4	2	2	4	1	has antiseptic action	2	Mouth care toothbrush	4	2	no	4	1	12	1	hear	1	atomization	2	No	0
	11	28	2.54	12	42.8571	16	57.1429	0	5	17.8571	8	28.5714	9	32.1429	11	39.2857	1	12h regulations	4	2	2	4	1	has antiseptic action	2	Mouth care toothbrush	4	2	no	4	1	12	1	hear	1	atomization	2	No	3.05
	11	28	2.54	12	42.8571	16	57.1429	0	5	17.8571	8	28.5714	9	32.1429	11	39.2857	1	12h regulations	4	2	2	4	1	has antiseptic action	2	Mouth care toothbrush	4	2	no	4	1	12	1	hear	1	atomization	2	No	6.1
	11	28	2.54	12	42.8571	16	57.1429	0	5	17.8571	8	28.5714	9	32.1429	11	39.2857	1	12h regulations	4	2	2	4	1	has antiseptic action	2	Mouth care toothbrush	4	2	no	4	1	12	1	hear	1	atomization	2	No	0
	11	28	2.54	12	42.8571	16	57.1429	0	5	17.8571	8	28.5714	9	32.1429	11	39.2857	1	12h regulations	4	2	2	4	1	has antiseptic action	2	Mouth care toothbrush	4	2	no	4	1	12	1	hear	1	atomization	2	No	2.71
	11	28	2.54	12	42.8571	16	57.1429	0	5	17.8571	8	28.5714	9	32.1429	11	39.2857	1	12h regulations	4	2	2	4	1	has antiseptic action	2	Mouth care toothbrush	4	2	no	4	1	12	1	hear	1	atomization	2	No	5.42
Handan Central Hospital	32	69	2.15	28	40.5797	41	59.4203	0	7	10.1449	7	10.1449	48	69.5652	14	20.2899	1	12h regulations	4	2	2	3	1	has antiseptic action	1	Oral care package	1	2	no	6	1	16	2	no hear	1	atomization	1	Yes	0
	32	69	2.15	28	40.5797	41	59.4203	0	7	10.1449	7	10.1449	48	69.5652	14	20.2899	1	12h regulations	4	2	2	3	1	has antiseptic action	1	Oral care package	1	2	no	6	1	16	2	no hear	1	atomization	1	Yes	0
	32	69	2.15	28	40.5797	41	59.4203	0	7	10.1449	7	10.1449	48	69.5652	14	20.2899	1	12h regulations	4	2	2	3	1	has antiseptic action	1	Oral care package	1	2	no	6	1	16	2	no hear	1	atomization	1	Yes	0
	32	69	2.15	28	40.5797	41	59.4203	0	7	10.1449	7	10.1449	48	69.5652	14	20.2899	1	12h regulations	4	2	2	3	1	has antiseptic action	1	Oral care package	1	2	no	6	1	16	2	no hear	1	atomization	1	Yes	0
	32	69	2.15	28	40.5797	41	59.4203	0	7	10.1449	7	10.1449	48	69.5652	14	20.2899	1	12h regulations	4	2	2	3	1	has antiseptic action	1	Oral care package	1	2	no	6	1	16	2	no hear	1	atomization	1	Yes	0
	32	69	2.15	28	40.5797	41	59.4203	0	7	10.1449	7	10.1449	48	69.5652	14	20.2899	1	12h regulations	4	2	2	3	1	has antiseptic action	1	Oral care package	1	2	no	6	1	16	2	no hear	1	atomization	1	Yes	0
	32	69	2.15	28	40.5797	41	59.4203	0	7	10.1449	7	10.1449	48	69.5652	14	20.2899	1	12h regulations	4	2	2	3	1	has antiseptic action	1	Oral care package	1	2	no	6	1	16	2	no hear	1	atomization	1	Yes	5.68
	32	69	2.15	28	40.5797	41	59.4203	0	7	10.1449	7	10.1449	48	69.5652	14	20.2899	1	12h regulations	4	2	2	3	1	has antiseptic action	1	Oral care package	1	2	no	6	1	16	2	no hear	1	atomization	1	Yes	0
	32	69	2.15	28	40.5797	41	59.4203	0	7	10.1449	7	10.1449	48	69.5652	14	20.2899	1	12h regulations	4	2	2	3	1	has antiseptic action	1	Oral care package	1	2	no	6	1	16	2	no hear	1	atomization	1	Yes	0
	32	69	2.15	28	40.5797	41	59.4203	0	7	10.1449	7	10.1449	48	69.5652	14	20.2899	1	12h regulations	4	2	2	3	1	has antiseptic action	1	Oral care package	1	2	no	6	1	16	2	no hear	1	atomization	1	Yes	6.6
	32	69	2.15	28	40.5797	41	59.4203	0	7	10.1449	7	10.1449	48	69.5652	14	20.2899	1	12h regulations	4	2	2	3	1	has antiseptic action	1	Oral care package	1	2	no	6	1	16	2	no hear	1	atomization	1	Yes	3.8
	32	69	2.15	28	40.5797	41	59.4203	0	7	10.1449	7	10.1449	48	69.5652	14	20.2899	1	12h regulations	4	2	2	3	1	has antiseptic action	1	Oral care package	1	2	no	6	1	16	2	no hear	1	atomization	1	Yes	3.07
Zhangjiakou First Hospital	10	34	3.4	3	8.82353	29	85.2941	2	2	5.88235	18	52.9412	16	47.0588	0	0	1	12h regulations	4	1	2	4	1	has antiseptic action	1	Oral care package	1	2	no	6	1	12	1	hear	2	No atomization	2	No	0
	10	34	3.4	3	8.82353	29	85.2941	2	2	5.88235	18	52.9412	16	47.0588	0	0	1	12h regulations	4	1	2	4	1	has antiseptic action	1	Oral care package	1	2	no	6	1	12	1	hear	2	No atomization	2	No	9.62
	10	34	3.4	3	8.82353	29	85.2941	2	2	5.88235	18	52.9412	16	47.0588	0	0	1	12h regulations	4	1	2	4	1	has antiseptic action	1	Oral care package	1	2	no	6	1	12	1	hear	2	No atomization	2	No	0
	10	34	3.4	3	8.82353	29	85.2941	2	2	5.88235	18	52.9412	16	47.0588	0	0	1	12h regulations	4	1	2	4	1	has antiseptic action	1	Oral care package	1	2	no	6	1	12	1	hear	2	No atomization	2	No	0
	10	34	3.4	3	8.82353	29	85.2941	2	2	5.88235	18	52.9412	16	47.0588	0	0	1	12h regulations	4	1	2	4	1	has antiseptic action	1	Oral care package	1	2	no	6	1	12	1	hear	2	No atomization	2	No	8.93
	10	34	3.4	3	8.82353	29	85.2941	2	2	5.88235	18	52.9412	16	47.0588	0	0	1	12h regulations	4	1	2	4	1	has antiseptic action	1	Oral care package	1	2	no	6	1	12	1	hear	2	No atomization	2	No	0
	10	34	3.4	3	8.82353	29	85.2941	2	2	5.88235	18	52.9412	16	47.0588	0	0	1	12h regulations	4	1	2	4	1	has antiseptic action	1	Oral care package	1	2	no	6	1	12	1	hear	2	No atomization	2	No	0
	10	34	3.4	3	8.82353	29	85.2941	2	2	5.88235	18	52.9412	16	47.0588	0	0	1	12h regulations	4	1	2	4	1	has antiseptic action	1	Oral care package	1	2	no	6	1	12	1	hear	2	No atomization	2	No	0
	10	34	3.4	3	8.82353	29	85.2941	2	2	5.88235	18	52.9412	16	47.0588	0	0	1	12h regulations	4	1	2	4	1	has antiseptic action	1	Oral care package	1	2	no	6	1	12	1	hear	2	No atomization	2	No	0
	10	34	3.4	3	8.82353	29	85.2941	2	2	5.88235	18	52.9412	16	47.0588	0	0	1	12h regulations	4	1	2	4	1	has antiseptic action	1	Oral care package	1	2	no	6	1	12	1	hear	2	No atomization	2	No	0
	10	34	3.4	3	8.82353	29	85.2941	2	2	5.88235	18	52.9412	16	47.0588	0	0	1	12h regulations	4	1	2	4	1	has antiseptic action	1	Oral care package	1	2	no	6	1	12	1	hear	2	No atomization	2	No	0
	10	34	3.4	3	8.82353	29	85.2941	2	2	5.88235	18	52.9412	16	47.0588	0	0	1	12h regulations	4	1	2	4	1	has antiseptic action	1	Oral care package	1	2	no	6	1	12	1	hear	2	No atomization	2	No	0
Zhuozhou Hospital	9	24	2.66	18	75	6	25	0	0	0	15	62.5	5	20.8333	4	16.6667	1	12h regulations	4	3	3	2	1	has antiseptic action	1	Oral care package	4	1	yes	6	1	12	1	hear	1	atomization	1	Yes	7.12
	9	24	2.66	18	75	6	25	0	0	0	15	62.5	5	20.8333	4	16.6667	1	12h regulations	4	3	3	2	1	has antiseptic action	1	Oral care package	4	1	yes	6	1	12	1	hear	1	atomization	1	Yes	3.02
	9	24	2.66	18	75	6	25	0	0	0	15	62.5	5	20.8333	4	16.6667	1	12h regulations	4	3	3	2	1	has antiseptic action	1	Oral care package	4	1	yes	6	1	12	1	hear	1	atomization	1	Yes	2
	9	24	2.66	18	75	6	25	0	0	0	15	62.5	5	20.8333	4	16.6667	1	12h regulations	4	3	3	2	1	has antiseptic action	1	Oral care package	4	1	yes	6	1	12	1	hear	1	atomization	1	Yes	0
	9	24	2.66	18	75	6	25	0	0	0	15	62.5	5	20.8333	4	16.6667	1	12h regulations	4	3	3	2	1	has antiseptic action	1	Oral care package	4	1	yes	6	1	12	1	hear	1	atomization	1	Yes	7.95
	9	24	2.66	18	75	6	25	0	0	0	15	62.5	5	20.8333	4	16.6667	1	12h regulations	4	3	3	2	1	has antiseptic action	1	Oral care package	4	1	yes	6	1	12	1	hear	1	atomization	1	Yes	0
	9	24	2.66	18	75	6	25	0	0	0	15	62.5	5	20.8333	4	16.6667	1	12h regulations	4	3	3	2	1	has antiseptic action	1	Oral care package	4	1	yes	6	1	12	1	hear	1	atomization	1	Yes	6.32
	9	24	2.66	18	75	6	25	0	0	0	15	62.5	5	20.8333	4	16.6667	1	12h regulations	4	3	3	2	1	has antiseptic action	1	Oral care package	4	1	yes	6	1	12	1	hear	1	atomization	1	Yes	9.22
	9	24	2.66	18	75	6	25	0	0	0	15	62.5	5	20.8333	4	16.6667	1	12h regulations	4	3	3	2	1	has antiseptic action	1	Oral care package	4	1	yes	6	1	12	1	hear	1	atomization	1	Yes	11.21
	9	24	2.66	18	75	6	25	0	0	0	15	62.5	5	20.8333	4	16.6667	1	12h regulations	4	3	3	2	1	has antiseptic action	1	Oral care package	4	1	yes	6	1	12	1	hear	1	atomization	1	Yes	5.32
	9	24	2.66	18	75	6	25	0	0	0	15	62.5	5	20.8333	4	16.6667	1	12h regulations	4	3	3	2	1	has antiseptic action	1	Oral care package	4	1	yes	6	1	12	1	hear	1	atomization	1	Yes	8.23
	9	24	2.66	18	75	6	25	0	0	0	15	62.5	5	20.8333	4	16.6667	1	12h regulations	4	3	3	2	1	has antiseptic action	1	Oral care package	4	1	yes	6	1	12	1	hear	1	atomization	1	Yes	5.31
Cangzhou People's Hospital	24	48	2	13	27.0833	34	70.8333	1	15	31.25	26	54.1667	12	25	10	20.8333	1	12h regulations	4	2	2	3	1	has antiseptic action	1	Oral care package	4	1	yes	4	1	12	1	hear	1	atomization	1	Yes	0
	24	48	2	13	27.0833	34	70.8333	1	15	31.25	26	54.1667	12	25	10	20.8333	1	12h regulations	4	2	2	3	1	has antiseptic action	1	Oral care package	4	1	yes	4	1	12	1	hear	1	atomization	1	Yes	0
	24	48	2	13	27.0833	34	70.8333	1	15	31.25	26	54.1667	12	25	10	20.8333	1	12h regulations	4	2	2	3	1	has antiseptic action	1	Oral care package	4	1	yes	4	1	12	1	hear	1	atomization	1	Yes	0.7
	24	48	2	13	27.0833	34	70.8333	1	15	31.25	26	54.1667	12	25	10	20.8333	1	12h regulations	4	2	2	3	1	has antiseptic action	1	Oral care package	4	1	yes	4	1	12	1	hear	1	atomization	1	Yes	0
	24	48	2	13	27.0833	34	70.8333	1	15	31.25	26	54.1667	12	25	10	20.8333	1	12h regulations	4	2	2	3	1	has antiseptic action	1	Oral care package	4	1	yes	4	1	12	1	hear	1	atomization	1	Yes	2.4
	24	48	2	13	27.0833	34	70.8333	1	15	31.25	26	54.1667	12	25	10	20.8333	1	12h regulations	4	2	2	3	1	has antiseptic action	1	Oral care package	4	1	yes	4	1	12	1	hear	1	atomization	1	Yes	2.38
	24	48	2	13	27.0833	34	70.8333	1	15	31.25	26	54.1667	12	25	10	20.8333	1	12h regulations	4	2	2	3	1	has antiseptic action	1	Oral care package	4	1	yes	4	1	12	1	hear	1	atomization	1	Yes	0
	24	48	2	13	27.0833	34	70.8333	1	15	31.25	26	54.1667	12	25	10	20.8333	1	12h regulations	4	2	2	3	1	has antiseptic action	1	Oral care package	4	1	yes	4	1	12	1	hear	1	atomization	1	Yes	0
	24	48	2	13	27.0833	34	70.8333	1	15	31.25	26	54.1667	12	25	10	20.8333	1	12h regulations	4	2	2	3	1	has antiseptic action	1	Oral care package	4	1	yes	4	1	12	1	hear	1	atomization	1	Yes	0
	24	48	2	13	27.0833	34	70.8333	1	15	31.25	26	54.1667	12	25	10	20.8333	1	12h regulations	4	2	2	3	1	has antiseptic action	1	Oral care package	4	1	yes	4	1	12	1	hear	1	atomization	1	Yes	0
	24	48	2	13	27.0833	34	70.8333	1	15	31.25	26	54.1667	12	25	10	20.8333	1	12h regulations	4	2	2	3	1	has antiseptic action	1	Oral care package	4	1	yes	4	1	12	1	hear	1	atomization	1	Yes	0
	24	48	2	13	27.0833	34	70.8333	1	15	31.25	26	54.1667	12	25	10	20.8333	1	12h regulations	4	2	2	3	1	has antiseptic action	1	Oral care package	4	1	yes	4	1	12	1	hear	1	atomization	1	Yes	12.66
Shijiazhuang First Hospital	50	92	1.84	18	19.5652	73	79.3478	1	12	13.0435	34	36.9565	37	40.2174	21	22.8261	2	8h regulations	5	3	3	3	1	has antiseptic action	1	Oral care package	1	2	no	6	1	12	2	no hear	1	atomization	1	Yes	3.02
	50	92	1.84	18	19.5652	73	79.3478	1	12	13.0435	34	36.9565	37	40.2174	21	22.8261	2	8h regulations	5	3	3	3	1	has antiseptic action	1	Oral care package	1	2	no	6	1	12	2	no hear	1	atomization	1	Yes	0
	50	92	1.84	18	19.5652	73	79.3478	1	12	13.0435	34	36.9565	37	40.2174	21	22.8261	2	8h regulations	5	3	3	3	1	has antiseptic action	1	Oral care package	1	2	no	6	1	12	2	no hear	1	atomization	1	Yes	0
	50	92	1.84	18	19.5652	73	79.3478	1	12	13.0435	34	36.9565	37	40.2174	21	22.8261	2	8h regulations	5	3	3	3	1	has antiseptic action	1	Oral care package	1	2	no	6	1	12	2	no hear	1	atomization	1	Yes	0
	50	92	1.84	18	19.5652	73	79.3478	1	12	13.0435	34	36.9565	37	40.2174	21	22.8261	2	8h regulations	5	3	3	3	1	has antiseptic action	1	Oral care package	1	2	no	6	1	12	2	no hear	1	atomization	1	Yes	0
	50	92	1.84	18	19.5652	73	79.3478	1	12	13.0435	34	36.9565	37	40.2174	21	22.8261	2	8h regulations	5	3	3	3	1	has antiseptic action	1	Oral care package	1	2	no	6	1	12	2	no hear	1	atomization	1	Yes	0
	50	92	1.84	18	19.5652	73	79.3478	1	12	13.0435	34	36.9565	37	40.2174	21	22.8261	2	8h regulations	5	3	3	3	1	has antiseptic action	1	Oral care package	1	2	no	6	1	12	2	no hear	1	atomization	1	Yes	0
	50	92	1.84	18	19.5652	73	79.3478	1	12	13.0435	34	36.9565	37	40.2174	21	22.8261	2	8h regulations	5	3	3	3	1	has antiseptic action	1	Oral care package	1	2	no	6	1	12	2	no hear	1	atomization	1	Yes	7.14
	50	92	1.84	18	19.5652	73	79.3478	1	12	13.0435	34	36.9565	37	40.2174	21	22.8261	2	8h regulations	5	3	3	3	1	has antiseptic action	1	Oral care package	1	2	no	6	1	12	2	no hear	1	atomization	1	Yes	0
	50	92	1.84	18	19.5652	73	79.3478	1	12	13.0435	34	36.9565	37	40.2174	21	22.8261	2	8h regulations	5	3	3	3	1	has antiseptic action	1	Oral care package	1	2	no	6	1	12	2	no hear	1	atomization	1	Yes	11.63
	50	92	1.84	18	19.5652	73	79.3478	1	12	13.0435	34	36.9565	37	40.2174	21	22.8261	2	8h regulations	5	3	3	3	1	has antiseptic action	1	Oral care package	1	2	no	6	1	12	2	no hear	1	atomization	1	Yes	13.57
	50	92	1.84	18	19.5652	73	79.3478	1	12	13.0435	34	36.9565	37	40.2174	21	22.8261	2	8h regulations	5	3	3	3	1	has antiseptic action	1	Oral care package	1	2	no	6	1	12	2	no hear	1	atomization	1	Yes	13.1
Qinhuangdao First Hospital	22	73	3.31	0	0	68	93.1507	5	7	9.58904	17	23.2877	53	72.6027	3	4.10959	2	8h regulations	2.5	2	2	3	1	has antiseptic action	1	Oral care package	1	1	yes	3	1	12	1	hear	1	atomization	1	Yes	0
	22	73	3.31	0	0	68	93.1507	5	7	9.58904	17	23.2877	53	72.6027	3	4.10959	2	8h regulations	2.5	2	2	3	1	has antiseptic action	1	Oral care package	1	1	yes	3	1	12	1	hear	1	atomization	1	Yes	0
	22	73	3.31	0	0	68	93.1507	5	7	9.58904	17	23.2877	53	72.6027	3	4.10959	2	8h regulations	2.5	2	2	3	1	has antiseptic action	1	Oral care package	1	1	yes	3	1	12	1	hear	1	atomization	1	Yes	3.2
	22	73	3.31	0	0	68	93.1507	5	7	9.58904	17	23.2877	53	72.6027	3	4.10959	2	8h regulations	2.5	2	2	3	1	has antiseptic action	1	Oral care package	1	1	yes	3	1	12	1	hear	1	atomization	1	Yes	0
	22	73	3.31	0	0	68	93.1507	5	7	9.58904	17	23.2877	53	72.6027	3	4.10959	2	8h regulations	2.5	2	2	3	1	has antiseptic action	1	Oral care package	1	1	yes	3	1	12	1	hear	1	atomization	1	Yes	2.5
	22	73	3.31	0	0	68	93.1507	5	7	9.58904	17	23.2877	53	72.6027	3	4.10959	2	8h regulations	2.5	2	2	3	1	has antiseptic action	1	Oral care package	1	1	yes	3	1	12	1	hear	1	atomization	1	Yes	0
	22	73	3.31	0	0	68	93.1507	5	7	9.58904	17	23.2877	53	72.6027	3	4.10959	2	8h regulations	2.5	2	2	3	1	has antiseptic action	1	Oral care package	1	1	yes	3	1	12	1	hear	1	atomization	1	Yes	6.9
	22	73	3.31	0	0	68	93.1507	5	7	9.58904	17	23.2877	53	72.6027	3	4.10959	2	8h regulations	2.5	2	2	3	1	has antiseptic action	1	Oral care package	1	1	yes	3	1	12	1	hear	1	atomization	1	Yes	3.3
	22	73	3.31	0	0	68	93.1507	5	7	9.58904	17	23.2877	53	72.6027	3	4.10959	2	8h regulations	2.5	2	2	3	1	has antiseptic action	1	Oral care package	1	1	yes	3	1	12	1	hear	1	atomization	1	Yes	2.3
	22	73	3.31	0	0	68	93.1507	5	7	9.58904	17	23.2877	53	72.6027	3	4.10959	2	8h regulations	2.5	2	2	3	1	has antiseptic action	1	Oral care package	1	1	yes	3	1	12	1	hear	1	atomization	1	Yes	2.8
	22	73	3.31	0	0	68	93.1507	5	7	9.58904	17	23.2877	53	72.6027	3	4.10959	2	8h regulations	2.5	2	2	3	1	has antiseptic action	1	Oral care package	1	1	yes	3	1	12	1	hear	1	atomization	1	Yes	7.5
	22	73	3.31	0	0	68	93.1507	5	7	9.58904	17	23.2877	53	72.6027	3	4.10959	2	8h regulations	2.5	2	2	3	1	has antiseptic action	1	Oral care package	1	1	yes	3	1	12	1	hear	1	atomization	1	Yes	0
Langfang People's Hospital	8	19	2.37	0	0	19	100	0	5	26.3158	3	15.7895	16	84.2105	0	0	1	12h regulations	4	3	3	3	1	has antiseptic action	1	Oral care package	1	2	no	6	1	12	1	hear	2	No atomization	1	Yes	0
	8	19	2.37	0	0	19	100	0	5	26.3158	3	15.7895	16	84.2105	0	0	1	12h regulations	4	3	3	3	1	has antiseptic action	1	Oral care package	1	2	no	6	1	12	1	hear	2	No atomization	1	Yes	0
	8	19	2.37	0	0	19	100	0	5	26.3158	3	15.7895	16	84.2105	0	0	1	12h regulations	4	3	3	3	1	has antiseptic action	1	Oral care package	1	2	no	6	1	12	1	hear	2	No atomization	1	Yes	0
	8	19	2.37	0	0	19	100	0	5	26.3158	3	15.7895	16	84.2105	0	0	1	12h regulations	4	3	3	3	1	has antiseptic action	1	Oral care package	1	2	no	6	1	12	1	hear	2	No atomization	1	Yes	7.76
	8	19	2.37	0	0	19	100	0	5	26.3158	3	15.7895	16	84.2105	0	0	1	12h regulations	4	3	3	3	1	has antiseptic action	1	Oral care package	1	2	no	6	1	12	1	hear	2	No atomization	1	Yes	0
	8	19	2.37	0	0	19	100	0	5	26.3158	3	15.7895	16	84.2105	0	0	1	12h regulations	4	3	3	3	1	has antiseptic action	1	Oral care package	1	2	no	6	1	12	1	hear	2	No atomization	1	Yes	0
	8	19	2.37	0	0	19	100	0	5	26.3158	3	15.7895	16	84.2105	0	0	1	12h regulations	4	3	3	3	1	has antiseptic action	1	Oral care package	1	2	no	6	1	12	1	hear	2	No atomization	1	Yes	0
	8	19	2.37	0	0	19	100	0	5	26.3158	3	15.7895	16	84.2105	0	0	1	12h regulations	4	3	3	3	1	has antiseptic action	1	Oral care package	1	2	no	6	1	12	1	hear	2	No atomization	1	Yes	18.87
	8	19	2.37	0	0	19	100	0	5	26.3158	3	15.7895	16	84.2105	0	0	1	12h regulations	4	3	3	3	1	has antiseptic action	1	Oral care package	1	2	no	6	1	12	1	hear	2	No atomization	1	Yes	0
	8	19	2.37	0	0	19	100	0	5	26.3158	3	15.7895	16	84.2105	0	0	1	12h regulations	4	3	3	3	1	has antiseptic action	1	Oral care package	1	2	no	6	1	12	1	hear	2	No atomization	1	Yes	0
	8	19	2.37	0	0	19	100	0	5	26.3158	3	15.7895	16	84.2105	0	0	1	12h regulations	4	3	3	3	1	has antiseptic action	1	Oral care package	1	2	no	6	1	12	1	hear	2	No atomization	1	Yes	0
	8	19	2.37	0	0	19	100	0	5	26.3158	3	15.7895	16	84.2105	0	0	1	12h regulations	4	3	3	3	1	has antiseptic action	1	Oral care package	1	2	no	6	1	12	1	hear	2	No atomization	1	Yes	0
Harrison International Peace Hospital	25	55	2.2	19	34.5455	36	65.4545	0	37	67.2727	24	43.6364	17	30.9091	14	25.4545	1	12h regulations	4	2	2	3	1	has antiseptic action	1	Oral care package	1	1	yes	3	1	14	1	hear	1	atomization	1	Yes	0
	25	55	2.2	19	34.5455	36	65.4545	0	37	67.2727	24	43.6364	17	30.9091	14	25.4545	1	12h regulations	4	2	2	3	1	has antiseptic action	1	Oral care package	1	1	yes	3	1	14	1	hear	1	atomization	1	Yes	6.15
	25	55	2.2	19	34.5455	36	65.4545	0	37	67.2727	24	43.6364	17	30.9091	14	25.4545	1	12h regulations	4	2	2	3	1	has antiseptic action	1	Oral care package	1	1	yes	3	1	14	1	hear	1	atomization	1	Yes	0
	25	55	2.2	19	34.5455	36	65.4545	0	37	67.2727	24	43.6364	17	30.9091	14	25.4545	1	12h regulations	4	2	2	3	1	has antiseptic action	1	Oral care package	1	1	yes	3	1	14	1	hear	1	atomization	1	Yes	2.3
	25	55	2.2	19	34.5455	36	65.4545	0	37	67.2727	24	43.6364	17	30.9091	14	25.4545	1	12h regulations	4	2	2	3	1	has antiseptic action	1	Oral care package	1	1	yes	3	1	14	1	hear	1	atomization	1	Yes	1.8
	25	55	2.2	19	34.5455	36	65.4545	0	37	67.2727	24	43.6364	17	30.9091	14	25.4545	1	12h regulations	4	2	2	3	1	has antiseptic action	1	Oral care package	1	1	yes	3	1	14	1	hear	1	atomization	1	Yes	0
	25	55	2.2	19	34.5455	36	65.4545	0	37	67.2727	24	43.6364	17	30.9091	14	25.4545	1	12h regulations	4	2	2	3	1	has antiseptic action	1	Oral care package	1	1	yes	3	1	14	1	hear	1	atomization	1	Yes	0
	25	55	2.2	19	34.5455	36	65.4545	0	37	67.2727	24	43.6364	17	30.9091	14	25.4545	1	12h regulations	4	2	2	3	1	has antiseptic action	1	Oral care package	1	1	yes	3	1	14	1	hear	1	atomization	1	Yes	3.7
	25	55	2.2	19	34.5455	36	65.4545	0	37	67.2727	24	43.6364	17	30.9091	14	25.4545	1	12h regulations	4	2	2	3	1	has antiseptic action	1	Oral care package	1	1	yes	3	1	14	1	hear	1	atomization	1	Yes	4.5
	25	55	2.2	19	34.5455	36	65.4545	0	37	67.2727	24	43.6364	17	30.9091	14	25.4545	1	12h regulations	4	2	2	3	1	has antiseptic action	1	Oral care package	1	1	yes	3	1	14	1	hear	1	atomization	1	Yes	2.7
	25	55	2.2	19	34.5455	36	65.4545	0	37	67.2727	24	43.6364	17	30.9091	14	25.4545	1	12h regulations	4	2	2	3	1	has antiseptic action	1	Oral care package	1	1	yes	3	1	14	1	hear	1	atomization	1	Yes	0
	25	55	2.2	19	34.5455	36	65.4545	0	37	67.2727	24	43.6364	17	30.9091	14	25.4545	1	12h regulations	4	2	2	3	1	has antiseptic action	1	Oral care package	1	1	yes	3	1	14	1	hear	1	atomization	1	Yes	0
Fengfeng General Hospital	11	24	2.18	4	16.6667	20	83.3333	0	2	8.33333	5	20.8333	10	41.6667	9	37.5	2	8h regulations	5	3	3	3	1	has antiseptic action	2	Mouth care toothbrush	4	1	yes	3	1	14	1	hear	1	atomization	1	Yes	18.52
	11	24	2.18	4	16.6667	20	83.3333	0	2	8.33333	5	20.8333	10	41.6667	9	37.5	2	8h regulations	5	3	3	3	1	has antiseptic action	2	Mouth care toothbrush	4	1	yes	3	1	14	1	hear	1	atomization	1	Yes	0
	11	24	2.18	4	16.6667	20	83.3333	0	2	8.33333	5	20.8333	10	41.6667	9	37.5	2	8h regulations	5	3	3	3	1	has antiseptic action	2	Mouth care toothbrush	4	1	yes	3	1	14	1	hear	1	atomization	1	Yes	4.26
	11	24	2.18	4	16.6667	20	83.3333	0	2	8.33333	5	20.8333	10	41.6667	9	37.5	2	8h regulations	5	3	3	3	1	has antiseptic action	2	Mouth care toothbrush	4	1	yes	3	1	14	1	hear	1	atomization	1	Yes	0
	11	24	2.18	4	16.6667	20	83.3333	0	2	8.33333	5	20.8333	10	41.6667	9	37.5	2	8h regulations	5	3	3	3	1	has antiseptic action	2	Mouth care toothbrush	4	1	yes	3	1	14	1	hear	1	atomization	1	Yes	10.87
	11	24	2.18	4	16.6667	20	83.3333	0	2	8.33333	5	20.8333	10	41.6667	9	37.5	2	8h regulations	5	3	3	3	1	has antiseptic action	2	Mouth care toothbrush	4	1	yes	3	1	14	1	hear	1	atomization	1	Yes	6.58
	11	24	2.18	4	16.6667	20	83.3333	0	2	8.33333	5	20.8333	10	41.6667	9	37.5	2	8h regulations	5	3	3	3	1	has antiseptic action	2	Mouth care toothbrush	4	1	yes	3	1	14	1	hear	1	atomization	1	Yes	0
	11	24	2.18	4	16.6667	20	83.3333	0	2	8.33333	5	20.8333	10	41.6667	9	37.5	2	8h regulations	5	3	3	3	1	has antiseptic action	2	Mouth care toothbrush	4	1	yes	3	1	14	1	hear	1	atomization	1	Yes	24.39
	11	24	2.18	4	16.6667	20	83.3333	0	2	8.33333	5	20.8333	10	41.6667	9	37.5	2	8h regulations	5	3	3	3	1	has antiseptic action	2	Mouth care toothbrush	4	1	yes	3	1	14	1	hear	1	atomization	1	Yes	5.92
	11	24	2.18	4	16.6667	20	83.3333	0	2	8.33333	5	20.8333	10	41.6667	9	37.5	2	8h regulations	5	3	3	3	1	has antiseptic action	2	Mouth care toothbrush	4	1	yes	3	1	14	1	hear	1	atomization	1	Yes	0
	11	24	2.18	4	16.6667	20	83.3333	0	2	8.33333	5	20.8333	10	41.6667	9	37.5	2	8h regulations	5	3	3	3	1	has antiseptic action	2	Mouth care toothbrush	4	1	yes	3	1	14	1	hear	1	atomization	1	Yes	15.63
	11	24	2.18	4	16.6667	20	83.3333	0	2	8.33333	5	20.8333	10	41.6667	9	37.5	2	8h regulations	5	3	3	3	1	has antiseptic action	2	Mouth care toothbrush	4	1	yes	3	1	14	1	hear	1	atomization	1	Yes	15.23
Hebei Provincial People's Hospital	26	54	2.07	23	42.5926	29	53.7037	2	6	11.1111	29	53.7037	17	31.4815	8	14.8148	1	12h regulations	4	3	4	3	1	has antiseptic action	1	Oral care package	4	1	yes	3	1	12	1	hear	2	No atomization	2	No	2.77
	26	54	2.07	23	42.5926	29	53.7037	2	6	11.1111	29	53.7037	17	31.4815	8	14.8148	1	12h regulations	4	3	4	3	1	has antiseptic action	1	Oral care package	4	1	yes	3	1	12	1	hear	2	No atomization	2	No	0
	26	54	2.07	23	42.5926	29	53.7037	2	6	11.1111	29	53.7037	17	31.4815	8	14.8148	1	12h regulations	4	3	4	3	1	has antiseptic action	1	Oral care package	4	1	yes	3	1	12	1	hear	2	No atomization	2	No	3.36
	26	54	2.07	23	42.5926	29	53.7037	2	6	11.1111	29	53.7037	17	31.4815	8	14.8148	1	12h regulations	4	3	4	3	1	has antiseptic action	1	Oral care package	4	1	yes	3	1	12	1	hear	2	No atomization	2	No	0
	26	54	2.07	23	42.5926	29	53.7037	2	6	11.1111	29	53.7037	17	31.4815	8	14.8148	1	12h regulations	4	3	4	3	1	has antiseptic action	1	Oral care package	4	1	yes	3	1	12	1	hear	2	No atomization	2	No	3.33
	26	54	2.07	23	42.5926	29	53.7037	2	6	11.1111	29	53.7037	17	31.4815	8	14.8148	1	12h regulations	4	3	4	3	1	has antiseptic action	1	Oral care package	4	1	yes	3	1	12	1	hear	2	No atomization	2	No	0
	26	54	2.07	23	42.5926	29	53.7037	2	6	11.1111	29	53.7037	17	31.4815	8	14.8148	1	12h regulations	4	3	4	3	1	has antiseptic action	1	Oral care package	4	1	yes	3	1	12	1	hear	2	No atomization	2	No	3.81
	26	54	2.07	23	42.5926	29	53.7037	2	6	11.1111	29	53.7037	17	31.4815	8	14.8148	1	12h regulations	4	3	4	3	1	has antiseptic action	1	Oral care package	4	1	yes	3	1	12	1	hear	2	No atomization	2	No	0
	26	54	2.07	23	42.5926	29	53.7037	2	6	11.1111	29	53.7037	17	31.4815	8	14.8148	1	12h regulations	4	3	4	3	1	has antiseptic action	1	Oral care package	4	1	yes	3	1	12	1	hear	2	No atomization	2	No	3.98
	26	54	2.07	23	42.5926	29	53.7037	2	6	11.1111	29	53.7037	17	31.4815	8	14.8148	1	12h regulations	4	3	4	3	1	has antiseptic action	1	Oral care package	4	1	yes	3	1	12	1	hear	2	No atomization	2	No	2.61
	26	54	2.07	23	42.5926	29	53.7037	2	6	11.1111	29	53.7037	17	31.4815	8	14.8148	1	12h regulations	4	3	4	3	1	has antiseptic action	1	Oral care package	4	1	yes	3	1	12	1	hear	2	No atomization	2	No	3.91
	26	54	2.07	23	42.5926	29	53.7037	2	6	11.1111	29	53.7037	17	31.4815	8	14.8148	1	12h regulations	4	3	4	3	1	has antiseptic action	1	Oral care package	4	1	yes	3	1	12	1	hear	2	No atomization	2	No	3.48
Wu 'an First People's Hospital	12	22	1.83	8	36.3636	14	63.6364	0	9	40.9091	10	45.4545	9	40.9091	3	13.6364	1	12h regulations	4	2	2	3	2	no antiseptic action	1	Oral care package	1	2	no	6	1	12	1	hear	2	No atomization	1	Yes	0
	12	22	1.83	8	36.3636	14	63.6364	0	9	40.9091	10	45.4545	9	40.9091	3	13.6364	1	12h regulations	4	2	2	3	2	no antiseptic action	1	Oral care package	1	2	no	6	1	12	1	hear	2	No atomization	1	Yes	17.86
	12	22	1.83	8	36.3636	14	63.6364	0	9	40.9091	10	45.4545	9	40.9091	3	13.6364	1	12h regulations	4	2	2	3	2	no antiseptic action	1	Oral care package	1	2	no	6	1	12	1	hear	2	No atomization	1	Yes	0
	12	22	1.83	8	36.3636	14	63.6364	0	9	40.9091	10	45.4545	9	40.9091	3	13.6364	1	12h regulations	4	2	2	3	2	no antiseptic action	1	Oral care package	1	2	no	6	1	12	1	hear	2	No atomization	1	Yes	0
	12	22	1.83	8	36.3636	14	63.6364	0	9	40.9091	10	45.4545	9	40.9091	3	13.6364	1	12h regulations	4	2	2	3	2	no antiseptic action	1	Oral care package	1	2	no	6	1	12	1	hear	2	No atomization	1	Yes	0
	12	22	1.83	8	36.3636	14	63.6364	0	9	40.9091	10	45.4545	9	40.9091	3	13.6364	1	12h regulations	4	2	2	3	2	no antiseptic action	1	Oral care package	1	2	no	6	1	12	1	hear	2	No atomization	1	Yes	0
	12	22	1.83	8	36.3636	14	63.6364	0	9	40.9091	10	45.4545	9	40.9091	3	13.6364	1	12h regulations	4	2	2	3	2	no antiseptic action	1	Oral care package	1	2	no	6	1	12	1	hear	2	No atomization	1	Yes	0
	12	22	1.83	8	36.3636	14	63.6364	0	9	40.9091	10	45.4545	9	40.9091	3	13.6364	1	12h regulations	4	2	2	3	2	no antiseptic action	1	Oral care package	1	2	no	6	1	12	1	hear	2	No atomization	1	Yes	0
	12	22	1.83	8	36.3636	14	63.6364	0	9	40.9091	10	45.4545	9	40.9091	3	13.6364	1	12h regulations	4	2	2	3	2	no antiseptic action	1	Oral care package	1	2	no	6	1	12	1	hear	2	No atomization	1	Yes	0
	12	22	1.83	8	36.3636	14	63.6364	0	9	40.9091	10	45.4545	9	40.9091	3	13.6364	1	12h regulations	4	2	2	3	2	no antiseptic action	1	Oral care package	1	2	no	6	1	12	1	hear	2	No atomization	1	Yes	38.46
	12	22	1.83	8	36.3636	14	63.6364	0	9	40.9091	10	45.4545	9	40.9091	3	13.6364	1	12h regulations	4	2	2	3	2	no antiseptic action	1	Oral care package	1	2	no	6	1	12	1	hear	2	No atomization	1	Yes	61.73
	12	22	1.83	8	36.3636	14	63.6364	0	9	40.9091	10	45.4545	9	40.9091	3	13.6364	1	12h regulations	4	2	2	3	2	no antiseptic action	1	Oral care package	1	2	no	6	1	12	1	hear	2	No atomization	1	Yes	54.05
The Fourth People's Hospital of Hengshui	14	27	1.92	1	3.7037	26	96.2963	0	4	14.8148	8	29.6296	19	70.3704	0	0	2	8h regulations	4	3	3	2	2	no antiseptic action	1	Oral care package	4	2	no	6	1	14	1	hear	1	atomization	1	Yes	0
	14	27	1.92	1	3.7037	26	96.2963	0	4	14.8148	8	29.6296	19	70.3704	0	0	2	8h regulations	4	3	3	2	2	no antiseptic action	1	Oral care package	4	2	no	6	1	14	1	hear	1	atomization	1	Yes	0
	14	27	1.92	1	3.7037	26	96.2963	0	4	14.8148	8	29.6296	19	70.3704	0	0	2	8h regulations	4	3	3	2	2	no antiseptic action	1	Oral care package	4	2	no	6	1	14	1	hear	1	atomization	1	Yes	1
	14	27	1.92	1	3.7037	26	96.2963	0	4	14.8148	8	29.6296	19	70.3704	0	0	2	8h regulations	4	3	3	2	2	no antiseptic action	1	Oral care package	4	2	no	6	1	14	1	hear	1	atomization	1	Yes	0
	14	27	1.92	1	3.7037	26	96.2963	0	4	14.8148	8	29.6296	19	70.3704	0	0	2	8h regulations	4	3	3	2	2	no antiseptic action	1	Oral care package	4	2	no	6	1	14	1	hear	1	atomization	1	Yes	0
	14	27	1.92	1	3.7037	26	96.2963	0	4	14.8148	8	29.6296	19	70.3704	0	0	2	8h regulations	4	3	3	2	2	no antiseptic action	1	Oral care package	4	2	no	6	1	14	1	hear	1	atomization	1	Yes	0
	14	27	1.92	1	3.7037	26	96.2963	0	4	14.8148	8	29.6296	19	70.3704	0	0	2	8h regulations	4	3	3	2	2	no antiseptic action	1	Oral care package	4	2	no	6	1	14	1	hear	1	atomization	1	Yes	0
	14	27	1.92	1	3.7037	26	96.2963	0	4	14.8148	8	29.6296	19	70.3704	0	0	2	8h regulations	4	3	3	2	2	no antiseptic action	1	Oral care package	4	2	no	6	1	14	1	hear	1	atomization	1	Yes	7.09
	14	27	1.92	1	3.7037	26	96.2963	0	4	14.8148	8	29.6296	19	70.3704	0	0	2	8h regulations	4	3	3	2	2	no antiseptic action	1	Oral care package	4	2	no	6	1	14	1	hear	1	atomization	1	Yes	28.85
	14	27	1.92	1	3.7037	26	96.2963	0	4	14.8148	8	29.6296	19	70.3704	0	0	2	8h regulations	4	3	3	2	2	no antiseptic action	1	Oral care package	4	2	no	6	1	14	1	hear	1	atomization	1	Yes	0
	14	27	1.92	1	3.7037	26	96.2963	0	4	14.8148	8	29.6296	19	70.3704	0	0	2	8h regulations	4	3	3	2	2	no antiseptic action	1	Oral care package	4	2	no	6	1	14	1	hear	1	atomization	1	Yes	3.91
	14	27	1.92	1	3.7037	26	96.2963	0	4	14.8148	8	29.6296	19	70.3704	0	0	2	8h regulations	4	3	3	2	2	no antiseptic action	1	Oral care package	4	2	no	6	1	14	1	hear	1	atomization	1	Yes	6.62
Chengde Central Hospital	15	22	1.46	1	4.54545	21	95.4545	0	1	4.54545	4	18.1818	10	45.4545	8	36.3636	1	12h regulations	4	3	3	2	2	no antiseptic action	1	Oral care package	1	2	no	6	1	12	1	hear	2	No atomization	1	Yes	0
	15	22	1.46	1	4.54545	21	95.4545	0	1	4.54545	4	18.1818	10	45.4545	8	36.3636	1	12h regulations	4	3	3	2	2	no antiseptic action	1	Oral care package	1	2	no	6	1	12	1	hear	2	No atomization	1	Yes	10.05
	15	22	1.46	1	4.54545	21	95.4545	0	1	4.54545	4	18.1818	10	45.4545	8	36.3636	1	12h regulations	4	3	3	2	2	no antiseptic action	1	Oral care package	1	2	no	6	1	12	1	hear	2	No atomization	1	Yes	6.17
	15	22	1.46	1	4.54545	21	95.4545	0	1	4.54545	4	18.1818	10	45.4545	8	36.3636	1	12h regulations	4	3	3	2	2	no antiseptic action	1	Oral care package	1	2	no	6	1	12	1	hear	2	No atomization	1	Yes	4.57
	15	22	1.46	1	4.54545	21	95.4545	0	1	4.54545	4	18.1818	10	45.4545	8	36.3636	1	12h regulations	4	3	3	2	2	no antiseptic action	1	Oral care package	1	2	no	6	1	12	1	hear	2	No atomization	1	Yes	0
	15	22	1.46	1	4.54545	21	95.4545	0	1	4.54545	4	18.1818	10	45.4545	8	36.3636	1	12h regulations	4	3	3	2	2	no antiseptic action	1	Oral care package	1	2	no	6	1	12	1	hear	2	No atomization	1	Yes	0
	15	22	1.46	1	4.54545	21	95.4545	0	1	4.54545	4	18.1818	10	45.4545	8	36.3636	1	12h regulations	4	3	3	2	2	no antiseptic action	1	Oral care package	1	2	no	6	1	12	1	hear	2	No atomization	1	Yes	0
	15	22	1.46	1	4.54545	21	95.4545	0	1	4.54545	4	18.1818	10	45.4545	8	36.3636	1	12h regulations	4	3	3	2	2	no antiseptic action	1	Oral care package	1	2	no	6	1	12	1	hear	2	No atomization	1	Yes	0
	15	22	1.46	1	4.54545	21	95.4545	0	1	4.54545	4	18.1818	10	45.4545	8	36.3636	1	12h regulations	4	3	3	2	2	no antiseptic action	1	Oral care package	1	2	no	6	1	12	1	hear	2	No atomization	1	Yes	0
	15	22	1.46	1	4.54545	21	95.4545	0	1	4.54545	4	18.1818	10	45.4545	8	36.3636	1	12h regulations	4	3	3	2	2	no antiseptic action	1	Oral care package	1	2	no	6	1	12	1	hear	2	No atomization	1	Yes	12.74
	15	22	1.46	1	4.54545	21	95.4545	0	1	4.54545	4	18.1818	10	45.4545	8	36.3636	1	12h regulations	4	3	3	2	2	no antiseptic action	1	Oral care package	1	2	no	6	1	12	1	hear	2	No atomization	1	Yes	0
	15	22	1.46	1	4.54545	21	95.4545	0	1	4.54545	4	18.1818	10	45.4545	8	36.3636	1	12h regulations	4	3	3	2	2	no antiseptic action	1	Oral care package	1	2	no	6	1	12	1	hear	2	No atomization	1	Yes	9.22
The Fourth Hospital of Hebei Medical University	12	47	3.91	4	8.51064	41	87.234	2	10	21.2766	21	44.6809	14	29.7872	12	25.5319	2	8h regulations	5	2	2	2	2	no antiseptic action	1	Oral care package	4	2	no	3	1	10	1	hear	2	No atomization	2	No	4.88
	12	47	3.91	4	8.51064	41	87.234	2	10	21.2766	21	44.6809	14	29.7872	12	25.5319	2	8h regulations	5	2	2	2	2	no antiseptic action	1	Oral care package	4	2	no	3	1	10	1	hear	2	No atomization	2	No	0
	12	47	3.91	4	8.51064	41	87.234	2	10	21.2766	21	44.6809	14	29.7872	12	25.5319	2	8h regulations	5	2	2	2	2	no antiseptic action	1	Oral care package	4	2	no	3	1	10	1	hear	2	No atomization	2	No	18.18
	12	47	3.91	4	8.51064	41	87.234	2	10	21.2766	21	44.6809	14	29.7872	12	25.5319	2	8h regulations	5	2	2	2	2	no antiseptic action	1	Oral care package	4	2	no	3	1	10	1	hear	2	No atomization	2	No	12.5
	12	47	3.91	4	8.51064	41	87.234	2	10	21.2766	21	44.6809	14	29.7872	12	25.5319	2	8h regulations	5	2	2	2	2	no antiseptic action	1	Oral care package	4	2	no	3	1	10	1	hear	2	No atomization	2	No	5.68
	12	47	3.91	4	8.51064	41	87.234	2	10	21.2766	21	44.6809	14	29.7872	12	25.5319	2	8h regulations	5	2	2	2	2	no antiseptic action	1	Oral care package	4	2	no	3	1	10	1	hear	2	No atomization	2	No	12.99
	12	47	3.91	4	8.51064	41	87.234	2	10	21.2766	21	44.6809	14	29.7872	12	25.5319	2	8h regulations	5	2	2	2	2	no antiseptic action	1	Oral care package	4	2	no	3	1	10	1	hear	2	No atomization	2	No	0
	12	47	3.91	4	8.51064	41	87.234	2	10	21.2766	21	44.6809	14	29.7872	12	25.5319	2	8h regulations	5	2	2	2	2	no antiseptic action	1	Oral care package	4	2	no	3	1	10	1	hear	2	No atomization	2	No	8.4
	12	47	3.91	4	8.51064	41	87.234	2	10	21.2766	21	44.6809	14	29.7872	12	25.5319	2	8h regulations	5	2	2	2	2	no antiseptic action	1	Oral care package	4	2	no	3	1	10	1	hear	2	No atomization	2	No	0
	12	47	3.91	4	8.51064	41	87.234	2	10	21.2766	21	44.6809	14	29.7872	12	25.5319	2	8h regulations	5	2	2	2	2	no antiseptic action	1	Oral care package	4	2	no	3	1	10	1	hear	2	No atomization	2	No	0
	12	47	3.91	4	8.51064	41	87.234	2	10	21.2766	21	44.6809	14	29.7872	12	25.5319	2	8h regulations	5	2	2	2	2	no antiseptic action	1	Oral care package	4	2	no	3	1	10	1	hear	2	No atomization	2	No	10.1
	12	47	3.91	4	8.51064	41	87.234	2	10	21.2766	21	44.6809	14	29.7872	12	25.5319	2	8h regulations	5	2	2	2	2	no antiseptic action	1	Oral care package	4	2	no	3	1	10	1	hear	2	No atomization	2	No	0
The Third Hospital of Hebei Medical University	17	43	2.52	5	11.6279	38	88.3721	0	5	11.6279	14	32.5581	22	51.1628	7	16.2791	1	12h regulations	5	3	3	3	1	has antiseptic action	1	Oral care package	4	2	no	4	1	12	1	hear	1	atomization	1	Yes	5.05
	17	43	2.52	5	11.6279	38	88.3721	0	5	11.6279	14	32.5581	22	51.1628	7	16.2791	1	12h regulations	5	3	3	3	1	has antiseptic action	1	Oral care package	4	2	no	4	1	12	1	hear	1	atomization	1	Yes	6.89
	17	43	2.52	5	11.6279	38	88.3721	0	5	11.6279	14	32.5581	22	51.1628	7	16.2791	1	12h regulations	5	3	3	3	1	has antiseptic action	1	Oral care package	4	2	no	4	1	12	1	hear	1	atomization	1	Yes	4.18
	17	43	2.52	5	11.6279	38	88.3721	0	5	11.6279	14	32.5581	22	51.1628	7	16.2791	1	12h regulations	5	3	3	3	1	has antiseptic action	1	Oral care package	4	2	no	4	1	12	1	hear	1	atomization	1	Yes	7.14
	17	43	2.52	5	11.6279	38	88.3721	0	5	11.6279	14	32.5581	22	51.1628	7	16.2791	1	12h regulations	5	3	3	3	1	has antiseptic action	1	Oral care package	4	2	no	4	1	12	1	hear	1	atomization	1	Yes	4.94
	17	43	2.52	5	11.6279	38	88.3721	0	5	11.6279	14	32.5581	22	51.1628	7	16.2791	1	12h regulations	5	3	3	3	1	has antiseptic action	1	Oral care package	4	2	no	4	1	12	1	hear	1	atomization	1	Yes	7.83
	17	43	2.52	5	11.6279	38	88.3721	0	5	11.6279	14	32.5581	22	51.1628	7	16.2791	1	12h regulations	5	3	3	3	1	has antiseptic action	1	Oral care package	4	2	no	4	1	12	1	hear	1	atomization	1	Yes	5.43
	17	43	2.52	5	11.6279	38	88.3721	0	5	11.6279	14	32.5581	22	51.1628	7	16.2791	1	12h regulations	5	3	3	3	1	has antiseptic action	1	Oral care package	4	2	no	4	1	12	1	hear	1	atomization	1	Yes	5.74
	17	43	2.52	5	11.6279	38	88.3721	0	5	11.6279	14	32.5581	22	51.1628	7	16.2791	1	12h regulations	5	3	3	3	1	has antiseptic action	1	Oral care package	4	2	no	4	1	12	1	hear	1	atomization	1	Yes	6.64
	17	43	2.52	5	11.6279	38	88.3721	0	5	11.6279	14	32.5581	22	51.1628	7	16.2791	1	12h regulations	5	3	3	3	1	has antiseptic action	1	Oral care package	4	2	no	4	1	12	1	hear	1	atomization	1	Yes	7.54
	17	43	2.52	5	11.6279	38	88.3721	0	5	11.6279	14	32.5581	22	51.1628	7	16.2791	1	12h regulations	5	3	3	3	1	has antiseptic action	1	Oral care package	4	2	no	4	1	12	1	hear	1	atomization	1	Yes	5.35
	17	43	2.52	5	11.6279	38	88.3721	0	5	11.6279	14	32.5581	22	51.1628	7	16.2791	1	12h regulations	5	3	3	3	1	has antiseptic action	1	Oral care package	4	2	no	4	1	12	1	hear	1	atomization	1	Yes	3.66
